# Supplementary material for: Coccolithus pelagicus subsp. braarudii morphological plasticity in response to variations in the Canary region upwelling system over the past 250 ka
Source: Copernicus journal article supplement (doi:10.5194/cp-2023-31), 2023-05-16
Supplement: Supplementary file 1 [file cp-2023-31-supplement.pdf]

| samples | 3 cm  | 8 cm  | 13 cm | 18 cm | 23 cm | 28 cm |
|---------|-------|-------|-------|-------|-------|-------|
|         | 13,19 | 12,49 | 12,03 | 14,29 | 10,57 | 10,27 |
|         | 12,51 | 11,51 | 12,76 | 13,45 | 10,77 | 10,72 |
|         | 13,49 | 13,75 | 12    | 12,45 | 13,2  | 10,88 |
|         | 13,56 | 14,55 | 13,25 | 12,62 | 12,84 | 12,6  |
|         | 14,03 | 12,83 | 14,13 | 13,02 | 14,05 | 11,45 |
|         | 11,74 | 14,81 | 12,87 | 14,63 | 11,51 | 12,62 |
|         | 11,88 | 11,36 | 14,14 | 15,02 | 13,91 | 12,48 |
|         | 13,13 | 13,74 | 12,36 | 13,77 | 13,61 | 13,87 |
|         | 11,57 | 14,17 | 13    | 10,43 | 14,03 | 15,29 |
|         | 12,25 | 14,42 | 13,32 | 14,59 | 12,88 | 12,85 |
|         | 14,34 | 13,71 | 11,51 | 7,46  | 13,6  | 8,51  |
|         | 13,8  | 9,43  | 12,02 | 14,19 | 12,57 | 14,15 |
|         | 13,1  | 13,94 | 13,97 | 13,4  | 13,63 | 11,73 |
|         | 10,98 | 13,27 | 13,01 | 14,07 | 9,12  | 14,43 |
|         | 11,59 | 13,44 | 11,95 | 13,97 | 12,3  | 12,11 |
|         | 13,32 | 14,04 | 12,44 | 13    | 13,17 | 12,94 |
|         | 13,46 | 10,74 | 11,61 | 12,5  | 13,85 | 14,27 |
|         | 13,61 | 11,94 | 12,62 | 12,28 | 11,58 | 13,39 |
|         | 11,07 | 15,44 | 12,97 | 13,49 | 12,64 | 7,6   |
|         | 12,7  | 12,09 | 11,57 | 11,65 | 13,1  | 15,57 |
|         | 12,41 | 12,22 | 12,46 | 15,58 | 12,05 | 14,48 |
|         | 13,11 | 13,02 | 13,06 | 12,7  | 14,4  | 11,32 |
|         | 14,71 | 14,54 | 13,01 | 12,32 | 12,54 | 12,45 |
|         | 12,45 | 12,82 | 13,96 | 9,83  | 12,8  | 12,01 |
|         | 13,37 | 9,92  | 12,11 | 11,93 | 11,62 | 13,88 |
|         | 15,12 | 11,55 | 7,3   | 13,88 | 14,64 | 11,35 |
|         | 13,65 | 12,95 | 11,7  | 14,35 | 13,52 | 8,24  |
|         | 13,24 | 13,82 | 14,65 | 12,04 | 12,12 | 14,09 |
|         | 12,36 | 13,41 | 12,74 | 7,36  | 13,08 | 13,94 |
|         | 15,22 | 12,72 | 12,83 | 13,81 | 13,52 | 14,82 |
|         | 11,28 | 13,94 | 7,22  | 12,8  | 11,94 | 7,42  |
|         | 14,09 | 14,07 | 12,46 | 13,96 | 14,22 | 11,08 |
|         | 13,79 | 13,63 | 12,38 | 12,96 | 13,08 | 8,87  |
|         | 11,89 | 12,65 | 12,91 | 14,69 | 14,37 | 13,73 |
|         | 14,55 | 11,27 | 11,54 | 11,65 | 14,04 | 12,16 |
|         | 14,15 | 12,09 | 13,28 | 13,92 | 12,49 | 10,1  |
|         | 13,14 | 14,07 | 13,76 | 13,68 | 13,97 | 11,41 |
|         | 11,46 | 11,7  | 12,04 | 12,21 | 15,42 | 9,13  |
|         | 12,84 | 8,01  | 13,42 | 14,74 | 11,95 | 12,11 |
|         | 13,49 | 9,37  | 12,69 | 12,85 | 11,95 | 13,87 |
|         | 12,6  | 12,86 | 12,49 | 11,17 | 6,75  | 13,75 |
|         | 12,45 | 12,29 | 12,68 | 12,4  | 12,4  | 13,63 |
|         | 14,49 | 12,65 | 13,64 | 12,17 | 13,27 | 11,42 |
|         | 13,87 | 13,96 | 13,06 | 10,5  | 13,94 | 13,71 |
|         | 13,02 | 13,87 | 8,12  | 10,5  | 12,15 | 6,79  |
|         | 13,72 | 12,36 | 13,1  | 11,74 | 12,46 | 11,56 |
|         | 13,87 | 13,82 | 12,01 | 12,17 | 13,1  | 8,66  |
|         | 14,34 | 12,53 | 13,83 | 14,06 | 11,55 | 7,85  |
|         | 10,64 | 11,88 | 13,88 | 11,58 | 13,99 | 11,99 |
|         | 14,93 | 14,7  | 14,14 | 12,35 | 11,74 | 11,49 |
|         | 13,81 | 13,87 | 10,57 | 13,83 | 13,38 | 13,23 |
|         | 13,21 | 13,39 | 12,96 | 9,03  | 12,74 | 10,38 |
|         | 12,65 | 14,14 | 12,95 | 11,46 | 13,11 | 13,33 |
|         | 14,43 | 13,22 | 13,43 | 13,28 | 14,11 | 12,33 |
|         | 14,46 | 6,84  | 14,21 | 12,72 | 14,39 | 7,89  |
|         | 13,76 | 15,27 | 11,72 | 13,73 | 14,15 | 12,34 |
|         | 15,01 | 11,44 | 14,26 | 13,09 | 11,78 | 12,85 |
|         | 12,97 | 12,65 | 14,35 | 13,69 | 14,77 | 12,83 |
|         | 13,43 | 14,62 | 12,13 | 12,8  | 13,97 | 6,15  |
|         | 11,81 | 11,98 | 12,19 | 14,46 | 13,27 | 14,71 |

|       |       |       |       |       |       |
|-------|-------|-------|-------|-------|-------|
| 11,19 | 13,6  | 11,79 | 10,46 | 14,15 | 13,39 |
| 11,76 | 11,12 | 11,06 | 14,55 | 13,47 | 12,88 |
| 10,69 | 13,12 | 12,39 | 11,28 | 14,54 | 12,95 |
| 11,69 | 11,12 | 11,7  | 11,19 | 12,79 | 11,95 |
| 13,22 | 13,35 | 15    | 13,16 | 13,36 | 14,77 |
| 15,23 | 15,01 | 14,1  | 12,68 | 14,08 | 13,78 |
| 11,89 | 12,96 | 10,33 | 11,24 | 12,39 | 13,75 |
| 13,64 | 12,14 | 12,27 | 13,42 | 14,51 | 12,7  |
| 13,65 |       | 13,72 | 12,85 | 14,28 | 12,86 |
| 12,93 |       | 13,68 | 13,49 | 13,12 | 12,36 |
| 12,88 |       | 13,43 | 11,31 | 13,24 | 11,91 |
| 14,23 |       | 12,43 | 13,51 | 14,62 | 13,91 |
| 13,01 |       | 14,1  | 14,43 | 13    | 12,94 |
| 11,64 |       | 15,19 | 12,38 | 13,13 | 14,87 |
| 8,01  |       | 13,59 | 12,36 | 12,55 | 13,01 |
| 12,24 |       | 12,2  | 14,15 | 12,48 | 13,03 |
| 12,96 |       | 14,65 | 11,62 | 12,07 | 12,22 |
| 13,34 |       | 12,5  | 13,13 | 12,38 | 6,8   |
| 12,02 |       | 12,88 | 13,16 | 13,31 | 12,88 |
| 12,11 |       | 10,95 | 12,03 | 8,74  | 12,34 |
| 13,11 |       | 12,09 | 12,78 | 11,95 | 13,72 |
| 13,43 |       | 12,7  | 13,8  | 14,01 | 13,5  |
| 8,61  |       | 14,47 | 13,52 | 14,67 | 12,42 |
| 13,3  |       | 13,27 | 12,66 | 10,98 | 11,15 |
| 12,95 |       | 12,5  | 8,14  | 12,93 | 13,36 |
| 13,67 |       | 10,35 | 14,3  | 12    | 14,74 |
| 13,54 |       | 11,07 | 11,74 | 13,32 | 13,13 |
| 12,71 |       | 14,16 | 9,52  | 12,95 | 13,89 |
| 10,98 |       | 12,47 | 10,21 | 14,39 | 12,07 |
| 13,16 |       | 13,3  | 12,44 | 11,12 | 6,97  |
| 12,91 |       | 10,62 | 12,33 | 12,81 | 13,41 |
| 12,9  |       | 11,7  | 13,98 | 12,94 | 12,14 |
| 13,38 |       | 9,15  | 11,9  | 12,93 | 13,71 |
| 10,94 |       | 11,1  | 14,05 | 13,89 | 13,18 |
| 13,05 |       | 11,07 | 10,02 | 11,88 | 12,27 |
| 13,16 |       | 11,91 | 12,46 | 11,13 | 8,44  |
| 13,68 |       | 13,21 | 13,77 | 11,13 | 6,92  |
| 11,18 |       | 11,52 | 13,68 | 12,28 | 13,25 |
| 11,88 |       | 13,88 | 12,46 | 12,98 | 13,67 |
| 12,29 |       | 11,44 | 7,49  | 14,4  | 14,55 |

|                       |    |    |    |    |    |    |
|-----------------------|----|----|----|----|----|----|
| 4 - 5 $\mu\text{m}$   | 0  | 0  | 0  | 0  | 0  | 0  |
| 5 - 6 $\mu\text{m}$   | 0  | 0  | 0  | 0  | 0  | 0  |
| 6 - 7 $\mu\text{m}$   | 0  | 1  | 0  | 0  | 1  | 5  |
| 7 - 8 $\mu\text{m}$   | 0  | 0  | 2  | 3  | 0  | 4  |
| 8 - 9 $\mu\text{m}$   | 2  | 1  | 1  | 1  | 1  | 5  |
| 9 - 10 $\mu\text{m}$  | 0  | 3  | 1  | 3  | 1  | 1  |
| 10 - 11 $\mu\text{m}$ | 5  | 1  | 5  | 6  | 3  | 5  |
| 11 - 12 $\mu\text{m}$ | 16 | 11 | 17 | 14 | 14 | 13 |
| 12 - 13 $\mu\text{m}$ | 22 | 17 | 35 | 28 | 28 | 27 |
| 13 - 14 $\mu\text{m}$ | 39 | 20 | 25 | 28 | 30 | 27 |
| 14 - 15 $\mu\text{m}$ | 12 | 11 | 12 | 15 | 21 | 11 |
| 15 - 16 $\mu\text{m}$ | 4  | 3  | 2  | 2  | 1  | 2  |
| 16 - 17 $\mu\text{m}$ | 0  | 0  | 0  | 0  | 0  | 0  |
| 17 - 18 $\mu\text{m}$ | 0  | 0  | 0  | 0  | 0  | 0  |

| <b>33 cm</b> | <b>38 cm</b> | <b>43 cm</b> | <b>48 cm</b> | <b>53 cm</b> | <b>58 cm</b> | <b>63 cm</b> |
|--------------|--------------|--------------|--------------|--------------|--------------|--------------|
| 13,88        | 15,26        | 12,98        | 11,23        | 14,37        | 13,75        | 8,32         |
| 10,94        | 12,3         | 12,83        | 13,59        | 13,05        | 13,41        | 11,14        |
| 12,41        | 14,66        | 11,9         | 14,55        | 7,81         | 12,77        | 15,43        |
| 12,58        | 13,58        | 12,66        | 12,52        | 15,52        | 13,09        | 8,65         |
| 13,16        | 9,58         | 6,79         | 12,64        | 14,08        | 12,66        | 11,31        |
| 14,71        | 13,46        | 15,1         | 11,18        | 13,87        | 12,41        | 12,18        |
| 9,5          | 13,14        | 12,19        | 13,94        | 14,44        | 15,31        | 12,92        |
| 13,54        | 13,96        | 13,34        | 12,86        | 13,85        | 13,61        | 6,96         |
| 12,05        | 13,31        | 15,07        | 12,66        | 13,96        | 12,36        | 11,98        |
| 14,58        | 11,77        | 14,22        | 12,68        | 12,77        | 13,87        | 12,65        |
| 11,53        | 13,13        | 12,42        | 11           | 13,61        | 8,6          | 12,42        |
| 6,46         | 13,73        | 13,92        | 13,76        | 12,49        | 13,78        | 12,96        |
| 15,41        | 12,93        | 11,87        | 12,51        | 12,93        | 14,22        | 15,34        |
| 11,44        | 12,65        | 14,16        | 13,13        | 7,22         | 13,49        | 14,81        |
| 11,99        | 12,99        | 11,22        | 11,12        | 11,58        | 9,2          | 14,14        |
| 12,81        | 11,73        | 14,16        | 12,99        | 14,78        | 14,34        | 13,9         |
| 13,17        | 14,83        | 10,49        | 7,7          | 13,48        | 14,29        | 8,84         |
| 11,18        | 14,21        | 13,91        | 12,08        | 11,82        | 7,67         | 13,35        |
| 13,26        | 13,34        | 12,02        | 10,4         | 13,9         | 13,76        | 14,76        |
| 13,15        | 12,27        | 14,27        | 12,59        | 13,34        | 13,04        | 13,84        |
| 14,01        | 13,42        | 12,35        | 13,02        | 13,88        | 11,94        | 12,25        |
| 9,91         | 13,27        | 13,06        | 14,35        | 12,97        | 13,81        | 5,67         |
| 11,65        | 12,64        | 11,85        | 11,46        | 12,29        | 13,43        | 12,58        |
| 13,87        | 8,16         | 12,94        | 12,64        | 13,21        | 12,61        | 13,06        |
| 14,3         | 6,49         | 11,25        | 13,37        | 14,24        | 13,63        | 13,4         |
| 12,7         | 13,87        | 8,03         | 6,36         | 14,42        | 13,16        | 11,51        |
| 12,74        | 14,93        | 13,56        | 12,63        | 13,27        | 12,2         | 11,35        |
| 12,2         | 13,87        | 13,52        | 13,13        | 13,92        | 12,25        | 12,87        |
| 11,82        | 10,11        | 12,23        | 12,72        | 11,98        | 10,08        | 7,86         |
| 7,62         | 11,55        | 11,62        | 7,69         | 12,38        | 12,72        | 7,62         |
| 10,91        | 13,16        | 11,84        | 13,44        | 12,26        | 13,43        | 13,2         |
| 12,35        | 13,03        | 12,17        | 8,54         | 14,82        | 14,32        | 11,1         |
| 12,43        | 11,22        | 10,89        | 13,42        | 14,6         | 12,8         | 6,33         |
| 12,77        | 11,49        | 14,14        | 12,04        | 11,78        | 14,27        | 8,9          |
| 12,81        | 13,23        | 14,49        | 13,12        | 12,03        | 12,44        | 12,47        |
| 14,47        | 12,89        | 13,41        | 14,38        | 14,25        | 14,03        | 11,34        |
| 11,1         | 14,31        | 11,6         | 12,27        | 14,53        | 13,74        | 13,96        |
| 13,62        | 13,02        | 14,3         | 12           | 13,81        | 13,14        | 16,03        |
| 13,04        | 12,91        | 13,08        | 11,49        | 14,02        | 14           | 12,95        |
| 14,17        | 12,46        | 10,76        | 12,52        | 13,62        | 14           | 11,79        |
| 14,43        | 14,44        | 11,27        | 14,18        | 12,63        | 11,98        | 11,06        |
| 13,87        | 11,63        | 7,77         | 14,82        | 11,98        | 12,98        | 15,88        |
| 11,46        | 12,26        | 14,95        | 8,89         | 7,82         | 14,13        | 13,48        |
| 8,4          | 6,27         | 14,39        | 14,01        | 9,76         | 14,03        | 12,36        |
| 14,37        | 11,81        | 11,99        | 12,45        | 11,65        | 13,75        | 13,41        |
| 14,85        | 12,53        | 11,74        | 11,96        | 13,01        | 12,23        | 11,91        |
| 8,24         | 9,1          | 12,85        | 13,34        | 12,83        | 14,96        | 14,58        |
| 11,62        | 12,83        | 11,61        | 13,48        | 12,41        | 14,19        | 13,92        |
| 12,86        | 14,32        | 13,39        | 14,41        | 12,84        | 14,17        | 11,49        |
| 13,17        | 11,24        | 13,85        | 14,43        | 13,59        | 12,75        | 14,38        |
| 13,58        | 6,81         | 11,8         | 11,53        | 14,4         | 14,3         | 10,22        |
| 13,3         | 14,41        | 11,65        | 12,04        | 12,36        | 14,96        | 13,89        |
| 12,26        | 13,53        | 13,16        | 12,06        | 11,33        | 11,44        | 13,35        |
| 5,27         | 13,17        | 12,16        | 11,75        | 12,32        | 12,5         | 13,04        |
| 12,79        | 13,94        | 11,97        | 12,72        | 14,98        | 13,01        | 12,09        |
| 7,97         | 11,72        | 13,92        | 11,86        | 14,06        | 14,74        | 11,94        |
| 13,14        | 13,59        | 14,27        | 12,23        | 6,96         | 10,03        | 14,35        |
| 14,12        | 11,86        | 12,01        | 12,71        | 12,78        | 12,44        | 13,97        |
| 13,31        | 13,85        | 11,57        | 6,15         | 13,13        | 13,29        | 11,99        |
| 12,31        | 12,41        | 14,54        | 12,49        | 12,71        | 11,81        | 11,41        |

|       |       |       |       |       |       |       |
|-------|-------|-------|-------|-------|-------|-------|
| 14,35 | 14,19 | 13,01 | 7,97  | 11,89 | 11,94 | 13,77 |
| 14,64 | 13,42 | 12,4  | 14,35 | 11,16 | 12,19 | 15,19 |
| 13,26 | 13,26 | 14,65 | 12,88 | 11,4  | 14,23 | 10,81 |
| 12,08 | 10,37 | 13,35 | 12,45 | 14,83 | 7,35  | 7,41  |
| 12,36 | 11,82 | 15,19 | 11,06 | 12,48 | 5,21  | 11,99 |
| 12,74 | 13,41 | 12,49 | 14,88 | 13,19 | 12,83 | 9,13  |
| 14,91 | 10,84 | 12,6  | 14,48 | 12,83 | 13,34 | 6,76  |
| 12,9  | 12,83 | 12,97 | 14,17 | 13,05 | 13,47 | 13,11 |
| 13,13 | 14    | 14,14 | 13,94 | 13,05 | 14,19 | 14,36 |
| 12,7  | 15,73 | 12,43 | 9,75  | 14,24 | 15,74 | 14,82 |
| 13,21 | 14,11 | 12,11 | 13,41 | 15,74 | 9,63  | 11,94 |
| 13,95 | 11,14 | 12,41 | 14,37 | 12,72 | 12,82 | 15,12 |
| 13,25 | 13,15 | 13,27 | 12,84 | 12,46 | 13,19 | 13,92 |
| 7,52  | 15,48 | 8,34  | 13,74 | 12,45 | 14,78 | 11,57 |
| 11,97 | 13,12 | 13,85 | 15,78 | 12,67 | 13,89 | 11,79 |
| 7,19  | 12,86 | 9,31  | 9,19  | 13,26 | 8,1   | 11,94 |
| 14,1  | 13,82 | 14,27 | 12,42 | 13,38 | 9,72  | 12,91 |
| 11,6  | 13,1  | 12,78 | 14,44 | 13,7  | 15,33 | 12,55 |
| 14,07 | 13,01 | 13,89 | 13,9  | 13    | 6,83  | 11,79 |
| 6,8   | 13,04 | 13,78 | 13,27 | 9,45  | 10,17 | 13,18 |
| 11,98 | 13,71 | 13,17 | 10,66 | 13,78 | 14,25 | 11,19 |
| 13,09 | 12,65 | 13,44 | 12,64 | 14,16 | 13,05 | 11,9  |
| 13,61 | 12,77 | 14,06 | 7,4   | 13,34 | 8,19  | 12,2  |
| 11,4  | 12,82 | 10,98 | 11,04 | 12,94 | 12,56 | 13,49 |
| 14,09 | 12,4  | 14,01 | 11,86 | 13,47 | 13,77 | 13,37 |
| 9,43  | 12,03 | 14,55 | 12,41 | 11,97 | 12,75 | 12,17 |
| 14,02 | 14,81 | 14,68 | 11,02 | 10,9  | 12,23 | 13,63 |
| 13,42 | 11,97 | 14,67 | 8,29  | 13,74 | 12,99 | 14,24 |
| 9,37  | 8,21  | 13,03 | 13,81 | 13,25 | 13,11 | 12,09 |
| 13,32 | 12,96 | 12,65 | 13,61 | 11,58 | 10,54 | 12,27 |
| 12,15 | 13,52 | 9,92  | 13,67 | 13,71 | 12,72 | 11,86 |
| 11,52 | 7,84  | 11,94 | 12,97 | 11,25 | 12,89 | 11,18 |
| 11,32 | 12,35 | 13,14 | 9,2   | 11,81 | 14,17 | 13,43 |
| 11,93 | 12,4  | 12,2  | 11,59 | 14,13 | 14,65 | 8,57  |
| 14,01 | 12,3  | 13,3  | 14,68 | 11,23 | 6,74  | 12,72 |
| 13,39 | 10,93 | 13,5  | 11,99 | 11,37 | 11,51 | 13,68 |
| 11,04 | 12,08 | 11,01 | 11,95 | 13    | 14,81 | 11,71 |
| 6,73  | 9,35  | 12,27 | 13,3  | 11,91 | 12,22 | 13,09 |
| 7,43  | 12,25 | 11,42 | 11,1  | 12,67 | 12,25 | 12,08 |
| 12,18 | 14,53 | 12,71 | 12,68 | 13,09 | 12,52 | 12,17 |

|    |    |    |    |    |    |    |
|----|----|----|----|----|----|----|
| 0  | 0  | 0  | 0  | 0  | 0  | 0  |
| 1  | 0  | 0  | 0  | 0  | 0  | 1  |
| 3  | 3  | 1  | 2  | 1  | 2  | 3  |
| 5  | 1  | 1  | 4  | 3  | 2  | 3  |
| 2  | 2  | 2  | 3  | 0  | 3  | 5  |
| 4  | 3  | 2  | 3  | 2  | 3  | 1  |
| 2  | 4  | 4  | 2  | 1  | 4  | 2  |
| 17 | 13 | 19 | 18 | 17 | 6  | 25 |
| 22 | 26 | 25 | 31 | 24 | 27 | 21 |
| 25 | 32 | 24 | 21 | 32 | 26 | 24 |
| 18 | 13 | 19 | 15 | 18 | 23 | 9  |
| 1  | 3  | 3  | 1  | 2  | 3  | 5  |
| 0  | 0  | 0  | 0  | 0  | 0  | 1  |
| 0  | 0  | 0  | 0  | 0  | 0  | 0  |

| <b>68 cm</b> | <b>73 cm</b> | <b>78 cm</b> | <b>83 cm</b> | <b>88 cm</b> | <b>93 cm</b> | <b>98 cm</b> |
|--------------|--------------|--------------|--------------|--------------|--------------|--------------|
| 12,03        | 11,42        | 11,99        | 15,71        | 13,89        | 10,59        | 12,94        |
| 13,59        | 10,98        | 11,43        | 10,62        | 12,06        | 12,01        | 14           |
| 10,9         | 12,45        | 11,61        | 11,62        | 10,73        | 14,08        | 11,08        |
| 11,95        | 14,35        | 14,44        | 12,48        | 14,74        | 14,26        | 13,68        |
| 13,23        | 12,36        | 14,09        | 13,02        | 13,28        | 12,72        | 13,77        |
| 14,69        | 15,36        | 12,42        | 12,88        | 14,17        | 13,95        | 10,95        |
| 13,58        | 12,88        | 14,72        | 13,83        | 10,89        | 10,39        | 15,02        |
| 14,49        | 13,94        | 14,62        | 10,59        | 12,7         | 12,72        | 13,42        |
| 13,84        | 12,78        | 13,3         | 12,74        | 14,42        | 13,79        | 11,82        |
| 11,19        | 11,85        | 13,36        | 12,46        | 11,55        | 12,94        | 13,47        |
| 12,53        | 11,56        | 13,62        | 13           | 13,42        | 10,08        | 12,93        |
| 14,65        | 11,66        | 13,43        | 14,55        | 12,72        | 13,17        | 12,16        |
| 12,27        | 12,65        | 13,13        | 12,66        | 13,28        | 10,96        | 14,34        |
| 8,47         | 11,42        | 13,97        | 13,97        | 9,79         | 13,7         | 12,84        |
| 13,74        | 12,71        | 13,17        | 12,05        | 12,81        | 10,73        | 14,74        |
| 13,9         | 14,05        | 12,44        | 14,29        | 13,47        | 12,41        | 11,63        |
| 12,06        | 13,98        | 13,78        | 12,51        | 13,77        | 13,43        | 13,59        |
| 13,65        | 10,59        | 11,12        | 13,29        | 12,67        | 13,32        | 12,24        |
| 11,11        | 12,78        | 13,91        | 11,6         | 12,36        | 12,21        | 13,84        |
| 12,93        | 11,97        | 12,8         | 13,73        | 12,44        | 11,71        | 10,38        |
| 12,01        | 14           | 10,2         | 11,44        | 12,85        | 15,17        | 11,86        |
| 12,21        | 13,88        | 12,7         | 13,12        | 14,44        | 14,15        | 11,23        |
| 15,04        | 13,4         | 12,84        | 12,64        | 12,35        | 13,9         | 12,66        |
| 12,09        | 13,13        | 10,92        | 12,58        | 15,15        | 14,85        | 13,53        |
| 11,88        | 14,65        | 12,75        | 12,44        | 12,63        | 12,65        | 12,5         |
| 14,22        | 11,29        | 12,4         | 12,9         | 10,48        | 12,63        | 14,45        |
| 13,68        | 12,75        | 12,17        | 11,07        | 12,82        | 11,87        | 11,69        |
| 7,99         | 12,89        | 12,17        | 11,8         | 13,2         | 11           | 11,2         |
| 12,95        | 12,91        | 15,08        | 12,9         | 12,44        | 12,87        | 11,86        |
| 13,04        | 12,24        | 13,23        | 14,74        | 14,32        | 14,51        | 14,41        |
| 12,06        | 13,34        | 13,28        | 12,64        | 11,22        | 14,93        | 14,42        |
| 13,58        | 13,45        | 12,18        | 13,34        | 13,14        | 14,03        | 14,41        |
| 11,21        | 12,65        | 12,8         | 13,55        | 13,07        | 14,93        | 11,7         |
| 14,08        | 13,65        | 11,42        | 13,72        | 14,06        | 13,88        | 14,06        |
| 15,23        | 13,44        | 12,86        | 14,44        | 13,67        | 13,25        | 12,75        |
| 12,55        | 15,27        | 13,76        | 12,57        | 11,17        | 13,39        | 11,9         |
| 13,93        | 12,7         | 14,77        | 14,23        | 11,36        | 12,04        | 13,95        |
| 7,46         | 12,35        | 13,45        | 12,19        | 13,52        | 13,78        | 13,4         |
| 14,18        | 12,45        | 14,17        | 12,99        | 11,69        | 15,65        | 13,87        |
| 13,8         | 11,44        | 13,82        | 12,61        | 14,55        | 10,49        | 10,64        |
| 12,93        | 14,31        | 12,12        | 12,6         | 11,49        | 13,87        | 14,34        |
| 11,18        | 12,93        | 13,33        | 13,9         | 12,18        | 12,88        | 14,27        |
| 12,44        | 14,56        | 13,16        | 14,15        | 7,83         | 13,19        | 12,77        |
| 13,84        | 12,74        | 13,46        | 14,05        | 13,6         | 11,88        | 12,63        |
| 12,77        | 11,61        | 7,34         | 14,68        | 13,36        | 12,59        | 12,84        |
| 13,87        | 11,64        | 12,93        | 14,42        | 14,5         | 13,72        | 10,7         |
| 12,08        | 13,34        | 14,4         | 11,28        | 13,96        | 13,61        | 15,29        |
| 12,07        | 12,73        | 13,37        | 13,99        | 12,39        | 15,69        | 10,39        |
| 12,16        | 11,49        | 14,95        | 12,64        | 12,59        | 12,98        | 13,7         |
| 14,63        | 12,92        | 12,53        | 14,63        | 11,97        | 11,29        | 14,03        |
| 12,43        | 14,05        | 14,23        | 15,27        | 11,01        | 12,68        | 14,23        |
| 12,96        | 14,36        | 13,6         | 15,16        | 12,67        | 11,11        | 14,99        |
| 7,94         | 12,65        | 12,58        | 13,14        | 13,31        | 12,42        | 14,1         |
| 12,55        | 12,13        | 13,37        | 11,79        | 13,95        | 10,23        | 13,15        |
| 7            | 13,8         | 12,46        | 13,56        | 12,64        | 9,75         | 12,42        |
| 12,88        | 14,48        | 10,4         | 12,47        | 13,75        | 13,65        | 11,91        |
| 12,27        | 11,73        | 12,39        | 14,92        | 16,18        | 14,86        | 15,14        |
| 9,36         | 11,21        | 12,11        | 10,88        | 14,35        | 11,21        | 11,49        |
| 13,5         | 14,58        | 11,07        | 12,09        | 9,14         | 11,54        | 11,52        |
| 13,07        | 13,25        | 13,59        | 14,57        | 11,77        | 12,55        | 12,33        |

|       |       |       |       |       |       |       |
|-------|-------|-------|-------|-------|-------|-------|
| 12,18 | 11,9  | 7,37  | 10,21 | 10,86 | 10,43 | 13,21 |
| 13,56 | 14,15 | 12,58 | 13,92 | 9,92  | 12,3  | 12,03 |
| 14,44 | 12,47 | 11,76 | 13,51 | 13,86 | 12,59 | 11,79 |
| 12,77 | 12,21 | 14,42 | 11,89 | 13,16 | 11,35 | 8,53  |
| 13,36 | 12,92 | 12,88 | 16,34 | 11,31 | 13,16 | 12,91 |
| 11,82 | 10,61 | 14,08 | 13,55 | 12,04 | 14,63 | 12,95 |
| 13,48 | 13,14 | 12,2  | 14,94 | 13,68 | 10,5  | 10,51 |
| 11,38 | 14,29 | 12,3  | 14,34 | 13,88 | 14,41 | 10,86 |
| 13,94 | 11,35 | 13,47 | 12,81 | 14,45 | 13,06 | 11,85 |
| 14,1  | 13,38 | 13,19 | 9,42  | 12,81 | 13,51 | 13,5  |
| 13,09 | 11,94 | 12,28 | 9,36  | 13,92 | 15,17 | 11,81 |
| 11,31 | 14,18 | 11,05 | 13,16 | 14,4  | 13,8  | 13,12 |
| 7,64  | 11,94 | 14,11 | 14,77 | 11,83 | 12,67 | 11,38 |
| 14,85 | 12    | 13,15 | 11,18 | 13,02 | 14,63 | 10,59 |
| 13,01 | 12,71 | 11,81 | 12,72 | 13,98 | 11,88 | 12,62 |
| 11,82 | 13,31 | 12,21 | 12,7  | 13,05 | 13,73 | 7,09  |
| 12,76 | 14,26 | 13,11 | 13,3  | 12,08 | 14,3  | 12,93 |
| 11,7  | 14,66 | 13,61 | 12,34 | 14,16 | 13,37 | 13,48 |
| 12,2  | 12,41 | 14,12 | 10,48 | 14,12 | 11,56 | 9,29  |
| 10,38 | 11,23 | 10,48 | 12,29 | 11,81 | 13,66 | 13,27 |
| 15,3  | 8,27  | 10,66 | 13,17 | 12,75 | 12,55 | 13,41 |
| 13,7  | 12,88 | 12,08 | 14,1  | 12,45 | 12,68 | 12,5  |
| 13,94 | 11,77 | 13,25 | 13,84 | 14,6  | 13,25 | 9,95  |
| 15,28 | 12,99 | 11,96 | 15,26 | 13,67 | 12,28 | 12,44 |
| 13,52 | 11,55 | 12,88 | 12,72 | 12,81 | 12,9  | 13,64 |
| 13,3  | 13,53 | 13,12 | 15,52 | 12,25 | 11,34 | 12,57 |
| 11,4  | 12,93 | 13,59 | 14,03 | 11,73 | 11,73 | 12,99 |
| 13,53 | 12,41 | 14,62 | 13,64 | 14,07 | 12,72 | 13,76 |
| 13,43 | 13,14 | 13,5  | 11,97 | 13,28 | 13,56 | 15,29 |
| 13,98 | 12,87 | 10,72 | 12,02 | 14,44 | 11,79 | 11,9  |
| 11,97 | 13,26 | 15,21 | 12,4  | 14,22 | 13,97 | 12,36 |
| 9,64  | 10,29 | 12,53 | 13,88 | 12,49 | 12,32 | 14,37 |
| 12,57 | 13,81 | 11,69 | 10,91 | 14,23 | 13,07 | 15,05 |
| 13,26 | 13,68 | 13,65 | 14,09 | 14,27 | 14,81 | 13,35 |
| 14,72 | 13,51 | 6,8   | 10,89 | 13,36 | 11,6  | 13,24 |
| 15,79 | 12,03 | 14,34 | 12,95 | 12,74 | 11,87 | 14,24 |
| 15,47 | 13,64 | 13,04 | 12,92 | 11,42 | 12,98 | 12,65 |
| 10,51 | 13,77 | 12,33 | 12,98 | 15,32 | 12,59 | 14,48 |
| 11,54 | 14,61 | 13,1  | 12,26 | 11,93 | 11,86 | 12,41 |
| 11,69 | 15,17 | 13,03 | 12,91 | 13,35 | 12,7  | 12,3  |

|    |    |    |    |    |    |    |
|----|----|----|----|----|----|----|
| 0  | 0  | 0  | 0  | 0  | 0  | 0  |
| 0  | 0  | 0  | 0  | 0  | 0  | 0  |
| 0  | 0  | 1  | 0  | 0  | 0  | 0  |
| 5  | 0  | 2  | 0  | 1  | 0  | 1  |
| 1  | 1  | 0  | 0  | 0  | 0  | 1  |
| 2  | 0  | 0  | 2  | 3  | 1  | 2  |
| 3  | 4  | 6  | 7  | 4  | 9  | 8  |
| 15 | 20 | 11 | 10 | 15 | 17 | 18 |
| 27 | 33 | 29 | 34 | 26 | 28 | 26 |
| 30 | 23 | 34 | 23 | 29 | 27 | 22 |
| 11 | 16 | 15 | 18 | 19 | 14 | 17 |
| 6  | 3  | 2  | 5  | 2  | 4  | 5  |
| 0  | 0  | 0  | 1  | 1  | 0  | 0  |
| 0  | 0  | 0  | 0  | 0  | 0  | 0  |

| <b>103 cm</b> | <b>108 cm</b> | <b>113 cm</b> | <b>118 cm</b> | <b>123 cm</b> | <b>128 cm</b> | <b>133 cm</b> |
|---------------|---------------|---------------|---------------|---------------|---------------|---------------|
| 10,53         | 12,14         | 13,5          | 11,74         | 12,44         | 14,23         | 11,39         |
| 10,91         | 14,49         | 12,21         | 10,24         | 13,59         | 12,91         | 11,8          |
| 12,64         | 13,06         | 13,94         | 11,95         | 13,6          | 13,12         | 13,84         |
| 13,51         | 14,44         | 13,4          | 11,98         | 13,95         | 12,07         | 11,81         |
| 13,95         | 11,45         | 14,1          | 13,94         | 13,75         | 13,96         | 12,47         |
| 10,17         | 12,58         | 11,48         | 11,05         | 13,46         | 12,17         | 11,78         |
| 11,23         | 12,39         | 14,23         | 11,53         | 12,85         | 13,72         | 13,8          |
| 14,83         | 13,96         | 12,47         | 12,41         | 11,24         | 13,85         | 11,45         |
| 14,12         | 12,8          | 10,91         | 8,41          | 13,95         | 12,5          | 12,66         |
| 13,88         | 9,89          | 12,35         | 14,05         | 12,99         | 11,79         | 13,98         |
| 12,06         | 13            | 13,55         | 12,84         | 13,55         | 12,68         | 14,89         |
| 12,69         | 10,9          | 12,23         | 14,84         | 13,02         | 11,73         | 13,27         |
| 13,18         | 13,77         | 13,59         | 14,64         | 12,19         | 12,02         | 13,3          |
| 13,72         | 11,83         | 12,26         | 11,76         | 10,25         | 13,65         | 12,63         |
| 11,34         | 7,85          | 11,4          | 11,14         | 14,38         | 11,36         | 11,35         |
| 13,51         | 14,41         | 9,83          | 12,11         | 11,65         | 14,81         | 12,7          |
| 10,63         | 13,71         | 10,64         | 12,08         | 11,39         | 13,67         | 13,34         |
| 11,33         | 10,12         | 13,07         | 14,1          | 11,44         | 13,93         | 14,21         |
| 11,54         | 12,04         | 11,06         | 13,42         | 13,49         | 13,01         | 11,18         |
| 11,45         | 10,55         | 13,12         | 12,38         | 13,32         | 13,87         | 14,02         |
| 13,4          | 14,38         | 11,1          | 14,53         | 12,8          | 11,7          | 10,57         |
| 14,67         | 12,1          | 13,37         | 12,95         | 13,75         | 10,81         | 11,23         |
| 12,83         | 15,53         | 13,86         | 14,84         | 12,54         | 13,34         | 13,03         |
| 10,58         | 14,35         | 11,63         | 12,83         | 12,21         | 11,99         | 13,51         |
| 13,42         | 11,49         | 12,59         | 12,02         | 12,63         | 12,95         | 13,72         |
| 9,52          | 9,29          | 12,35         | 13,64         | 7,65          | 12,99         | 12,84         |
| 13,7          | 12,92         | 13,48         | 10,34         | 12,34         | 14,65         | 12,83         |
| 13,14         | 12,25         | 14,78         | 12,2          | 14,54         | 13,21         | 12,83         |
| 13,78         | 10,75         | 10,72         | 11,26         | 12,2          | 11,65         | 14,08         |
| 13,97         | 12,55         | 12,74         | 11,3          | 12,48         | 10,62         | 11,51         |
| 13,68         | 12,66         | 13,78         | 14,23         | 11,76         | 14,4          | 11,94         |
| 14,21         | 12,97         | 11,17         | 10            | 14,6          | 11,09         | 11,27         |
| 14,91         | 13,62         | 14,32         | 11,12         | 14,52         | 14,46         | 14,45         |
| 14,51         | 11,37         | 12,64         | 14,17         | 12,1          | 13,42         | 12,21         |
| 15,29         | 13,13         | 11,93         | 12,69         | 11,23         | 12,98         | 11,39         |
| 14,36         | 11,35         | 14            | 12,94         | 12,72         | 11,73         | 10,95         |
| 12,16         | 9,04          | 14,33         | 10,48         | 13,21         | 14,98         | 12,62         |
| 15,17         | 14,26         | 10,52         | 13,4          | 12,41         | 11,14         | 14,16         |
| 13,82         | 13,32         | 12,8          | 14,47         | 12,38         | 14,22         | 13,34         |
| 10,04         | 14,14         | 10,96         | 13,84         | 11,51         | 13,95         | 12,35         |
| 14,72         | 11,43         | 10,46         | 13,9          | 12,78         | 13,81         | 13,71         |
| 12,44         | 12,74         | 14,71         | 12,82         | 12,86         | 13,75         | 12,86         |
| 12,89         | 13,06         | 11,83         | 11,6          | 12,22         | 11,8          | 12,48         |
| 15,81         | 13,7          | 12,28         | 10,42         | 13,56         | 12,82         | 12,16         |
| 13,61         | 11            | 10,95         | 13,85         | 14,06         | 12,72         | 14,12         |
| 13,12         | 12,4          | 11,74         | 13,49         | 13,23         | 10,73         | 12,19         |
| 13,94         | 13,54         | 11,4          | 12,75         | 13,03         | 12,45         | 15,66         |
| 12,35         | 13,38         | 12,96         | 13,45         | 13,12         | 11,78         | 13,98         |
| 12,06         | 11,16         | 12,41         | 10,27         | 12,19         | 14,11         | 13,38         |
| 15,89         | 13,45         | 13,4          | 13,18         | 13,64         | 10,81         | 11,08         |
| 12,48         | 15,97         | 12,65         | 13,01         | 13,58         | 13,5          | 12,15         |
| 11,8          | 12,8          | 11,98         | 13,28         | 14,02         | 11,23         | 12,83         |
| 15,01         | 13,67         | 12,44         | 14,05         | 11,44         | 11,96         | 11,15         |
| 12,93         | 11,37         | 12,79         | 9,98          | 11,51         | 11,96         | 11,45         |
| 11,63         | 14,69         | 11,12         | 14,6          | 12,54         | 11,48         | 11,72         |
| 11,77         | 13,91         | 12,61         | 14,88         | 11,07         | 12,64         | 14,24         |
| 12,71         | 14,07         | 14,72         | 12,08         | 15,71         | 12,17         | 12,51         |
| 13,39         | 11,89         | 10,13         | 13,47         | 11,65         | 12,42         | 14,3          |
| 14            | 12,65         | 11,57         | 14,09         | 11,08         | 12,91         | 11,99         |
| 12,17         | 13,61         | 12,05         | 13,66         | 12,74         | 12,6          | 14,62         |

|       |       |       |       |       |       |       |
|-------|-------|-------|-------|-------|-------|-------|
| 13,5  | 13,14 | 12    | 12,42 | 13,01 | 11,87 | 13,48 |
| 12,12 | 9,96  | 10,93 | 12,55 | 12,03 | 12,93 | 12,24 |
| 13,59 | 15,38 | 13,32 | 13,72 | 9,85  | 12,66 | 12,88 |
| 13,98 | 14,08 | 12,07 | 11,88 | 15,27 | 14,7  | 12,91 |
| 13,9  | 12,21 | 9,47  | 13,42 | 11,6  | 14,34 | 12,18 |
| 14,51 | 12,96 | 8,19  | 10,81 | 10,67 | 12,77 | 13,01 |
| 13,38 | 13,82 | 8,86  | 11,7  | 13,71 | 12,65 | 12,85 |
| 12,14 | 14,44 | 14,42 | 13,18 | 14,52 | 13,45 | 12,14 |
| 14,07 | 14,48 | 13,28 | 12,68 | 10,76 | 11,82 | 13,46 |
| 13,39 | 13,88 | 12,53 | 13,75 | 13    | 13,32 | 12,61 |
| 14,95 | 13,67 | 13,88 | 14,46 | 9,93  | 8,32  | 12,25 |
| 11,11 | 13,78 | 13,8  | 11,91 | 13,16 | 11,25 | 13,11 |
| 13,82 | 13,82 | 13,28 | 14,16 | 12,56 | 14,83 | 11,23 |
| 13,34 | 12,31 | 11,31 | 13,14 | 14,23 | 12,51 | 14,02 |
| 12,86 | 12,62 | 12,55 | 13,5  | 12,42 | 13,16 | 13,22 |
| 14,12 | 14,49 | 12,9  | 12,61 | 12,51 | 10,1  | 13,7  |
| 11,42 | 12,4  | 13,74 | 11,9  | 12,03 | 11,81 | 10,94 |
| 12,2  | 11,51 | 14,85 | 13,01 | 13,73 | 11,96 | 11,66 |
| 12,53 | 13,8  | 13,12 | 13,58 | 12,22 | 12,06 | 12,02 |
| 12,35 | 13,01 | 13,25 | 10,4  | 12,59 | 11,61 | 11,37 |
| 13,08 | 15,24 | 12,41 | 12,5  | 12,51 | 14,24 | 12,28 |
| 9,28  | 10,77 | 11,62 | 10,44 | 12,32 | 13,13 | 12,74 |
| 13,48 | 14,18 | 13,76 | 11,26 | 12,98 | 12,56 | 11,79 |
| 12,58 | 13,21 | 12,96 | 13,82 | 13,54 | 13,86 | 13,99 |
| 13,66 | 12,22 | 13,87 | 14,48 | 12,97 | 11,26 | 14,58 |
| 12,75 | 15,2  | 14,47 | 13,91 | 12,92 | 12,83 | 11,93 |
| 13,12 | 12,67 | 11,96 | 12,3  | 15,44 | 11,41 | 13,1  |
| 11,77 | 13,12 | 11,05 | 13,37 | 13,95 | 12,77 | 14,48 |
| 14,61 | 12,53 | 11,7  | 11,74 | 11,83 | 14,73 | 14,58 |
| 11,19 | 14,57 | 13,7  | 13,87 | 13,49 | 11,92 | 14,69 |
| 12,2  | 13,43 | 11,14 | 11,54 | 12,17 | 13,16 | 11,43 |
| 12,75 | 13,84 | 10,98 | 11,51 | 11,5  | 13,09 | 11,55 |
| 11,62 | 10,86 | 11,91 | 14,54 | 12,28 | 10,92 | 11,97 |
| 13,02 | 13,78 | 15,19 | 10,89 | 12,21 | 13,8  | 12,02 |
| 8,12  | 14,42 | 11,92 | 11,86 | 14,53 | 11,9  | 14,55 |
| 12,08 | 14,81 | 12,86 | 14,37 | 14,78 | 13,12 | 13,72 |
| 13,77 | 8,47  | 14,29 | 11,03 | 11,36 | 13,86 | 13,89 |
| 10,43 | 14,49 | 12,39 | 13,49 | 11,55 | 15,78 | 11,97 |
| 10,39 | 11,95 | 11,34 | 11,9  | 11,44 | 12,48 | 12,37 |
| 12,57 | 14,64 | 12,24 | 12,35 | 12,83 | 12,62 | 11,18 |

|    |    |    |    |    |    |    |
|----|----|----|----|----|----|----|
| 0  | 0  | 0  | 0  | 0  | 0  | 0  |
| 0  | 0  | 0  | 0  | 0  | 0  | 0  |
| 0  | 0  | 0  | 0  | 0  | 0  | 0  |
| 0  | 1  | 0  | 0  | 1  | 0  | 0  |
| 1  | 1  | 2  | 1  | 0  | 1  | 0  |
| 2  | 4  | 2  | 1  | 2  | 0  | 0  |
| 8  | 6  | 10 | 10 | 3  | 6  | 3  |
| 13 | 12 | 22 | 22 | 18 | 25 | 27 |
| 25 | 23 | 28 | 21 | 37 | 28 | 30 |
| 32 | 29 | 23 | 27 | 26 | 26 | 23 |
| 14 | 19 | 12 | 18 | 10 | 13 | 16 |
| 5  | 5  | 1  | 0  | 3  | 1  | 1  |
| 0  | 0  | 0  | 0  | 0  | 0  | 0  |
| 0  | 0  | 0  | 0  | 0  | 0  | 0  |



| <b>138 cm</b> | <b>143 cm</b> | <b>148 cm</b> | <b>153 cm</b> | <b>158 cm</b> | <b>163 cm</b> | <b>168 cm</b> |
|---------------|---------------|---------------|---------------|---------------|---------------|---------------|
| 12,3          | 14,16         | 12,76         | 13,14         | 12,85         | 13,34         | 12,05         |
| 12,98         | 11,85         | 9,73          | 10,57         | 13,16         | 9,13          | 13,25         |
| 14,29         | 11,98         | 6,84          | 10,2          | 10,6          | 11,01         | 12,88         |
| 13,35         | 11,29         | 12,07         | 12,69         | 12,01         | 14,51         | 10,94         |
| 12,35         | 11,57         | 12,34         | 11,17         | 12,89         | 15,09         | 11,13         |
| 11,43         | 15,11         | 13,47         | 7,41          | 12,75         | 12,29         | 11,49         |
| 12,39         | 14,34         | 13,38         | 7,44          | 12,65         | 13,62         | 11,25         |
| 13,21         | 12,13         | 11,07         | 14,27         | 11,95         | 12,38         | 11,94         |
| 11,94         | 11,74         | 13,44         | 13,44         | 14,38         | 13,07         | 12,9          |
| 10,55         | 12,1          | 12,74         | 7,27          | 13,64         | 13,88         | 14,4          |
| 13,06         | 13,49         | 8,71          | 8,88          | 7,03          | 11,96         | 11,63         |
| 12,59         | 13,19         | 13,19         | 12,24         | 7,37          | 12,27         | 12,15         |
| 14,8          | 9,9           | 14,1          | 13,3          | 8,78          | 11,84         | 12,37         |
| 12,46         | 11,91         | 12,64         | 12,3          | 12,6          | 12,7          | 11,08         |
| 12,38         | 14,39         | 12,48         | 12,43         | 12,57         | 13,81         | 13,04         |
| 14,19         | 12,54         | 8,11          | 13,47         | 9,77          | 12,94         | 13,14         |
| 12,28         | 12,46         | 11,58         | 14,31         | 11,01         | 12,04         | 15,06         |
| 7,86          | 11,95         | 12,44         | 12,55         | 11,72         | 11,8          | 12,66         |
| 10,95         | 13,23         | 13,16         | 13,94         | 7,39          | 12,89         | 12,62         |
| 10,97         | 11,1          | 11,32         | 9,38          | 12,82         | 12,19         | 13,88         |
| 14,49         | 10,35         | 13,07         | 12,4          | 10,49         | 10,79         | 13,81         |
| 12,46         | 8,76          | 13,49         | 12,88         | 11,7          | 13,98         | 13,21         |
| 14,49         | 12,59         | 15,49         | 6,7           | 13,96         | 13,58         | 13,67         |
| 10,75         | 12,62         | 15            | 9,59          | 12,66         | 15,34         | 10,17         |
| 12,92         | 10,93         | 15,88         | 11,74         | 15,33         | 11,77         | 14            |
| 13,87         | 10,57         | 10,1          | 11,76         | 13,3          | 14,17         | 12,33         |
| 8,81          | 14,16         | 14,01         | 12,14         | 11,36         | 13,56         | 12,45         |
| 14,36         | 11,84         | 8,17          | 14,02         | 13,48         | 14,08         | 12,88         |
| 11,76         | 12,86         | 10,71         | 10,09         | 12,14         | 12,95         | 12,51         |
| 13,21         | 14,55         | 9,92          | 7,44          | 15,86         | 12,38         | 13,11         |
| 13,85         | 12,77         | 11,39         | 14,27         | 12,32         | 15,89         | 10,14         |
| 12,62         | 12,36         | 7,17          | 13,01         | 10,08         | 12,32         | 11,86         |
| 12,47         | 15,12         | 7             | 12,77         | 11,78         | 12,43         | 13,61         |
| 13,32         | 11,7          | 8,71          | 13,86         | 10,59         | 14,35         | 14,55         |
| 13,67         | 11,69         | 8,66          | 13,4          | 10,92         | 13,43         | 8,54          |
| 12,75         | 13,66         | 13,39         | 13,91         | 13,18         | 11,97         | 12,36         |
| 11,99         | 14,09         | 7,87          | 12,21         | 9,7           | 12,06         | 12,44         |
| 12,26         | 14,23         | 11,07         | 12,67         | 9,13          | 12,48         | 13,09         |
| 13,34         | 12,08         | 7,74          | 10,64         | 13,62         | 12,9          | 12,99         |
| 11,07         | 13,61         | 11,68         | 6,59          | 12,47         | 14,15         | 12,32         |
| 12,88         | 11,77         | 10,42         | 13,9          | 11,88         | 12,93         | 13,66         |
| 13,23         | 12,27         | 8,93          | 9,94          | 10,67         | 13,04         | 12,76         |
| 14,81         | 13,96         | 14,45         | 10,51         | 7,73          | 11,48         | 13,9          |
| 11,31         | 12,48         | 10,24         | 10,37         | 13,58         | 12,66         | 12,33         |
| 13,66         | 11,56         | 14,18         | 13,08         | 13,11         | 12,28         | 12,91         |
| 11,65         | 11,33         | 13,26         | 12,54         | 8,34          | 14,39         | 14,25         |
| 9,55          | 12,05         | 13            | 13,66         | 11,28         | 14,39         | 12,81         |
| 12,88         | 12,78         | 13,13         | 9,27          | 14,41         | 11,88         | 11,07         |
| 12,93         | 12,39         | 10,69         | 10,27         | 10,8          | 14,06         | 13,61         |
| 11,46         | 11,35         | 13,83         | 12,8          | 14,4          | 11,63         | 13,03         |
| 13,24         | 6,33          | 12,51         | 12,56         | 11,13         | 12,44         | 11,29         |
| 12,42         | 10,81         | 10,64         | 14,36         | 13,59         | 11,02         | 9,44          |
| 10,48         | 9,86          | 5,96          | 11,65         | 10,11         | 11,61         | 14,37         |
| 13,37         | 12,51         | 13,45         | 12,39         | 13,2          | 14,27         | 14,4          |
| 13,97         | 11,68         | 13,4          | 12,36         | 14,69         | 12,45         | 12,19         |
| 11,32         | 12,83         | 12,43         | 12,88         | 11,64         | 12,81         | 11,92         |
| 8,54          | 12,61         | 8,22          | 11,81         | 6,21          | 10,92         | 13,54         |
| 14,33         | 14,01         | 10,73         | 11,53         | 13,15         | 13,03         | 13,62         |
| 13,18         | 13,4          | 13,93         | 11,71         | 11,67         | 13,74         | 11,82         |
| 12,65         | 14,28         | 11,93         | 10,84         | 12,83         | 10,36         | 12,36         |

|       |       |       |       |       |       |       |
|-------|-------|-------|-------|-------|-------|-------|
| 13,12 | 12,04 | 11,17 | 13,25 | 9,43  | 12,79 | 13,28 |
| 13,82 | 9,71  | 9,6   | 8,61  | 11,45 | 14,51 | 13,1  |
| 12,97 | 11,7  | 13,21 | 10,94 | 11,44 | 14,39 | 12,53 |
| 12,38 | 11,64 | 13,77 | 10,33 | 14,44 | 11,87 | 11,55 |
| 14,56 | 10,24 | 12,95 | 13,18 | 11,01 | 12,54 | 12,64 |
| 13,04 | 12,25 | 8,8   | 12,27 | 11,79 | 9,83  | 13,84 |
| 12,43 | 13,25 | 14,48 | 12,03 | 13,13 | 10,57 | 11,67 |
| 13,25 | 14,55 | 8,62  | 13,08 | 12,39 | 8,53  | 12,36 |
| 14,86 | 13,68 | 6,87  | 13,94 | 12,35 | 12,83 | 11,09 |
| 13,29 | 12,59 | 14,13 | 8,71  | 12,64 | 12,04 | 11,91 |
| 11,02 | 10,26 | 12,44 | 6,62  | 12,83 | 12,11 | 13,19 |
| 14,41 | 11,74 | 10,98 | 14,11 | 12,67 | 7,94  | 11,44 |
| 11,5  | 10,5  | 9,28  | 8,7   | 12,96 | 11,68 | 11,77 |
| 13,56 | 11,73 | 13,87 | 13,78 | 12,6  | 11,35 | 12,72 |
| 14,08 | 11,29 | 8,96  | 11,62 | 8,33  | 13,73 | 13,36 |
| 11,96 | 10,73 | 12,51 | 13,28 | 8,54  | 10,72 | 10,9  |
| 12,33 | 10,27 | 12,04 | 11,63 | 14,73 | 12,29 | 11,94 |
| 11,72 | 13,14 | 8,18  | 11,3  | 13,48 | 13,71 | 12,58 |
| 12,65 | 13,19 | 11,7  | 13,95 | 13,22 | 14,77 | 10,21 |
| 12,53 | 11,72 | 13,74 | 10,41 | 7,26  | 14,46 | 14,01 |
| 12,61 | 10,48 | 9,98  | 13,79 | 14,52 | 11,81 | 13,44 |
| 13,89 | 10,91 | 12,23 | 11,44 | 10,61 | 7,17  | 12,15 |
| 12,8  | 11,74 | 9,5   | 8,94  | 14,54 | 14,85 | 12,33 |
| 13,52 | 12,45 | 8,8   | 12,86 | 11,94 | 11,86 | 12,92 |
| 13,8  | 12,29 | 6,81  | 12,19 | 10,64 | 13,59 | 12,48 |
| 11,73 | 13,87 | 7,55  | 14,37 | 11,71 | 11,99 | 11,9  |
| 11,32 | 12,54 | 14,26 | 8,98  | 7,41  | 13,21 | 13,61 |
| 12,93 | 15,19 | 7,24  | 13,94 | 13,46 | 10,47 | 14,55 |
| 11,94 | 11,9  | 10,73 | 12,36 | 13,55 | 13,34 | 12,56 |
| 11,72 | 11,46 | 13,76 | 6,67  | 12,37 | 14,27 | 13,44 |
| 13,97 | 13,5  | 13,34 | 11,28 | 13,09 | 13,54 | 13,13 |
| 8,78  | 11,53 | 8,2   | 7,83  | 13,97 | 10,59 | 13,05 |
| 12,42 | 9,89  | 10,81 | 11,98 | 11,83 | 12,24 | 13,27 |
| 12,31 | 12,98 | 13,08 | 8,93  | 12,57 | 13,04 | 13,66 |
| 14,13 | 14,48 | 9,14  | 7,27  | 14,99 | 12,2  | 11,63 |
| 14,07 | 11,94 | 12,95 | 12,43 | 12,33 | 13,06 | 13,52 |
| 13,21 | 14,41 | 13,68 | 13,87 | 12,88 | 13,55 | 12,71 |
| 12,31 | 13,63 | 14,94 | 13,97 | 14,38 | 8,79  | 14,1  |
| 14,67 | 13,36 | 14,56 | 12,47 | 12,13 | 12,8  | 12,11 |
| 12,48 | 12,61 | 12,54 | 12,91 | 13,49 | 14,05 | 6,98  |

|    |    |    |    |    |    |    |   |
|----|----|----|----|----|----|----|---|
| 0  | 0  | 0  | 0  | 0  | 0  | 0  | 0 |
| 0  | 0  | 1  | 0  | 0  | 0  | 0  | 0 |
| 0  | 1  | 3  | 4  | 1  | 0  | 1  | 0 |
| 1  | 0  | 6  | 6  | 6  | 2  | 0  | 0 |
| 3  | 1  | 13 | 7  | 4  | 2  | 1  | 0 |
| 1  | 4  | 7  | 4  | 4  | 2  | 1  | 0 |
| 5  | 11 | 10 | 11 | 10 | 7  | 5  | 0 |
| 17 | 27 | 9  | 13 | 18 | 17 | 20 | 0 |
| 32 | 26 | 16 | 25 | 25 | 30 | 33 | 0 |
| 26 | 15 | 23 | 23 | 20 | 21 | 29 | 0 |
| 15 | 12 | 9  | 7  | 10 | 16 | 9  | 0 |
| 0  | 3  | 3  | 0  | 2  | 3  | 1  | 0 |
| 0  | 0  | 0  | 0  | 0  | 0  | 0  | 0 |
| 0  | 0  | 0  | 0  | 0  | 0  | 0  | 0 |

| <b>173 cm</b> | <b>178 cm</b> | <b>183 cm</b> | <b>188 cm</b> | <b>193 cm</b> | <b>197 cm</b> | <b>203 cm</b> |
|---------------|---------------|---------------|---------------|---------------|---------------|---------------|
| 13,19         | 13,56         | 13,98         | 13,01         | 11,44         | 12,41         | 12,22         |
| 14,68         | 11,99         | 12,24         | 10,44         | 13,22         | 13,51         | 14,12         |
| 12,53         | 12,46         | 10,16         | 13,96         | 11,69         | 14,18         | 14,22         |
| 12,54         | 11,4          | 13,61         | 11,73         | 11,41         | 13,54         | 12,3          |
| 11,1          | 14,28         | 12,22         | 13,27         | 13,55         | 12,68         | 12,18         |
| 10,81         | 12,03         | 13,63         | 10,57         | 13,88         | 14,63         | 13,6          |
| 11,7          | 12,83         | 13,13         | 9,27          | 11,76         | 6,96          | 13,46         |
| 11,94         | 15,36         | 13,89         | 10,94         | 13,07         | 11,38         | 13,62         |
| 13,34         | 11,29         | 11,23         | 11,42         | 13,88         | 13,58         | 14,05         |
| 13,28         | 13,75         | 9,34          | 11,82         | 9,55          | 12,45         | 14,1          |
| 12,83         | 15,12         | 14,19         | 11,72         | 13,42         | 13,21         | 14,98         |
| 11,72         | 10,71         | 12,8          | 10,88         | 11,34         | 13,82         | 12,6          |
| 10,58         | 14,47         | 10,59         | 13,99         | 10,13         | 11,37         | 12,55         |
| 13,54         | 14,11         | 14,24         | 14,47         | 11,5          | 14,19         | 11,65         |
| 13,08         | 14,48         | 9,68          | 11,15         | 14,77         | 13,98         | 14,05         |
| 13,12         | 11,53         | 13,26         | 12,35         | 13,08         | 11,13         | 14,17         |
| 12,49         | 13,03         | 14,21         | 13,72         | 13,06         | 12,98         | 15,1          |
| 11,28         | 11,78         | 13,73         | 14,01         | 10,63         | 14,6          | 14,02         |
| 12,93         | 12,67         | 11,73         | 13,73         | 12,52         | 13,04         | 12,94         |
| 13,99         | 14,07         | 14,45         | 10,11         | 15,79         | 13,03         | 14,91         |
| 6,85          | 11,5          | 12,28         | 11,82         | 13,98         | 13,21         | 13,29         |
| 11,86         | 13,58         | 13,23         | 11,16         | 14,32         | 15            | 13,97         |
| 10,6          | 12,61         | 12,14         | 13,97         | 11,81         | 13,4          | 14,53         |
| 11,21         | 13,39         | 13,94         | 14,08         | 14,03         | 15,09         | 14,04         |
| 13,45         | 11,19         | 11,63         | 14,62         | 14,04         | 14,89         | 12,97         |
| 12,25         | 12,63         | 12,18         | 13,85         | 10,59         | 12,81         | 11,07         |
| 12,45         | 12,56         | 12,95         | 14,56         | 13,51         | 13,81         | 12,54         |
| 10,97         | 13,27         | 10,58         | 14,39         | 11,9          | 15,82         | 12,38         |
| 12,55         | 14,5          | 12,49         | 12,29         | 14,66         | 14            | 13,04         |
| 11,57         | 14,79         | 14,73         | 10,87         | 12,02         | 12,36         | 13,05         |
| 14,59         | 11,06         | 14,17         | 12,21         | 14,21         | 13,01         | 13,17         |
| 12,92         | 13,71         | 13,87         | 13,52         | 12,11         | 11,86         | 13,6          |
| 13,13         | 11,43         | 9,91          | 14,19         | 13,57         | 12,05         | 12,38         |
| 13,1          | 12,57         | 13,89         | 14,68         | 13,9          | 13,14         | 7,6           |
| 10,1          | 12,12         | 12,41         | 14,51         | 10,89         | 14,35         | 14,46         |
| 10,27         | 13,01         | 12,92         | 13,49         | 11,94         | 13,6          | 12,23         |
| 13,7          | 14,13         | 11,94         | 13,52         | 11,01         | 14,93         | 14,5          |
| 14,12         | 13,57         | 11,72         | 12,53         | 11,65         | 13,12         | 12,61         |
| 11,14         | 12,64         | 12,49         | 14,89         | 13,53         | 12,91         | 13,49         |
| 10,06         | 13,96         | 13,43         | 12,53         | 11,51         | 15,3          | 14,21         |
| 11,72         | 13,5          | 15,39         | 13,74         | 12,14         | 14,77         | 15,02         |
| 12,03         | 11,75         | 12,21         | 13,59         | 13,83         | 12,51         | 14,52         |
| 12,54         | 13,12         | 11,74         | 11,49         | 13,4          | 13,13         | 13,87         |
| 7,67          | 10,1          | 14,13         | 14,07         | 11,32         | 14,05         | 13,61         |
| 11,82         | 14,01         | 12,55         | 12,79         | 14,19         | 11,79         | 11,7          |
| 12,36         | 7,79          | 11,64         | 13,32         | 10,46         | 13,02         | 14,55         |
| 10,02         | 14,05         | 15,06         | 11,07         | 13,96         | 14,05         | 15,25         |
| 10,49         | 13,6          | 13,38         | 14,72         | 13,92         | 12,64         | 7,64          |
| 11,89         | 10,79         | 13,93         | 11,58         | 14,14         | 13,22         | 12,2          |
| 13,77         | 13,47         | 12,56         | 12,86         | 11,24         | 13,84         | 12,03         |
| 11,14         | 11,52         | 13,34         | 13,19         | 13,98         | 14,1          | 14,02         |
| 11,17         | 8,82          | 12,88         | 12,1          | 13,84         | 15,1          | 12,84         |
| 11,84         | 14,25         | 14,56         | 13,55         | 10,75         | 13,37         | 12,62         |
| 13,76         | 12,09         | 11,91         | 13,61         | 13,54         | 12,15         | 12,85         |
| 14,38         | 11,81         | 12,35         | 11,16         | 13,66         | 7,48          | 14,54         |
| 12,53         | 12,12         | 13,02         | 11,71         | 13,31         | 11,6          | 14,63         |
| 14            | 10,9          | 12,4          | 13,76         | 10,93         | 12,72         | 13,4          |
| 11,87         | 12,93         | 12,84         | 14,32         | 11,99         | 8,54          | 15,67         |
| 10,81         | 11,78         | 15,08         | 10,42         | 14,57         | 12,18         | 13,64         |
| 10,59         | 14,1          | 14,3          | 11,31         | 13,47         | 13,29         | 13,98         |

|       |       |       |       |       |       |       |
|-------|-------|-------|-------|-------|-------|-------|
| 12,07 | 11,76 | 11,14 | 11,42 | 11,08 | 13,35 | 10,44 |
| 8,5   | 12,75 | 14,77 | 12,12 | 12,17 | 13,11 | 12,53 |
| 13,41 | 13,23 | 13,09 | 13,61 | 11,76 | 7,72  | 13,79 |
| 12,54 | 5,66  | 11,28 | 9,85  | 13,41 | 12,72 | 14,43 |
| 12,93 | 13,28 | 10,68 | 8,67  | 11,68 | 12,74 | 14,53 |
| 11,81 | 15,1  | 10,65 | 10,02 | 11,38 | 14,92 | 13,95 |
| 14,44 | 10,14 | 9,84  | 13,97 | 14,56 | 14,97 | 12,65 |
| 12,85 | 13,43 | 13,25 | 13,23 | 12,07 | 13,81 | 12,01 |
| 13,01 | 13,65 | 11,82 | 12,25 | 10,02 | 13,06 | 14,17 |
| 10,85 | 13,21 | 13,82 | 13,03 | 15,28 | 12,15 | 14,9  |
| 11,19 | 10,84 | 12,82 | 12,11 | 12,92 | 15,21 | 15,41 |
| 10,58 | 12,02 | 12,97 | 15,26 | 12,87 | 10,94 | 13,51 |
| 13,12 | 10,5  | 13,22 | 15,29 | 11,51 | 11,04 | 11,65 |
| 12,41 | 11,91 | 12,47 | 12,55 | 12,82 | 13,98 | 13,51 |
| 12,1  | 13,07 | 14,47 | 13,61 | 12,64 | 13,67 | 14,21 |
| 12,58 | 12,8  | 11,75 | 14,15 | 13,57 | 12,69 | 13,79 |
| 12,44 | 13,63 | 12,17 | 11,9  | 11,3  | 14,29 | 14,53 |
| 14,45 | 12,88 | 12,21 | 12,66 | 11,68 | 13,44 | 14,35 |
| 11,6  | 11,66 | 12,11 | 11,76 | 14,16 | 14,32 | 11,92 |
| 11,56 | 12,21 | 10,71 | 13,13 | 12,8  | 9,88  | 14,73 |
| 15,02 | 11,96 | 11,08 | 12,56 | 11,7  | 12,41 | 12,51 |
| 14,6  | 13,94 | 11,55 | 13,87 | 10,49 | 12,53 | 11,76 |
| 13,04 | 13,16 | 11,12 | 10,53 | 14,09 | 13,75 | 12,21 |
| 13,13 | 12,55 | 12,88 | 12,6  | 12,66 | 12,77 | 13,75 |
| 12,41 | 13,78 | 13,55 | 13    | 11,66 | 14,39 | 13,91 |
| 14,76 | 11,2  | 13,56 | 11,7  | 13,45 | 12,28 | 12,72 |
| 11,49 | 12,9  | 10,18 | 12,2  | 13,78 | 15,6  | 13,69 |
| 14,2  | 10,27 | 13,87 | 13,07 | 13,46 | 12,85 | 15,36 |
| 13,3  | 10,81 | 11,84 | 14,15 | 11,56 | 12,88 | 14,89 |
| 12,21 | 10,89 | 13,04 | 10,38 | 12,7  | 12,71 | 13,49 |
| 14,53 | 13,03 | 12,11 | 13,07 | 14,2  | 12,62 | 13,77 |
| 12,88 | 11,75 | 11,27 | 9,29  | 12,45 | 12,03 | 14,37 |
| 11,48 | 11,12 | 13,46 | 11,66 | 13,85 | 13,61 | 13,69 |
| 7,01  | 14,91 | 13,73 | 14,42 | 13,16 | 13,35 | 12,7  |
| 13,53 | 12,81 | 15,18 | 11,4  | 12,36 | 13,22 | 12,74 |
| 11,47 | 12,48 | 14,47 | 11,88 | 11,98 | 12,88 | 13,25 |
| 13,95 | 13,11 | 14,83 | 12,27 | 11,35 | 12,49 | 12,75 |
| 15,46 | 10,03 | 13,46 | 12,56 | 13,21 | 12,48 | 14,86 |
| 12,17 | 10,66 | 14,62 | 12,62 | 12,89 | 14,7  | 13,14 |
| 11,97 | 14,65 | 11,77 | 12,69 | 10,46 | 12,05 | 13,39 |

|    |    |    |    |    |    |    |
|----|----|----|----|----|----|----|
| 0  | 0  | 0  | 0  | 0  | 0  | 0  |
| 0  | 1  | 0  | 0  | 0  | 0  | 0  |
| 1  | 0  | 0  | 0  | 0  | 0  | 1  |
| 2  | 1  | 0  | 0  | 0  | 0  | 2  |
| 1  | 1  | 0  | 1  | 0  | 1  | 0  |
| 0  | 0  | 4  | 3  | 1  | 1  | 0  |
| 13 | 12 | 7  | 10 | 10 | 1  | 1  |
| 24 | 20 | 18 | 20 | 27 | 7  | 6  |
| 25 | 22 | 26 | 20 | 16 | 30 | 26 |
| 21 | 26 | 27 | 28 | 31 | 32 | 29 |
| 11 | 14 | 14 | 16 | 13 | 18 | 30 |
| 2  | 3  | 4  | 2  | 2  | 7  | 6  |
| 0  | 0  | 0  | 0  | 0  | 0  | 0  |
| 0  | 0  | 0  | 0  | 0  | 0  | 0  |

| <b>208 cm</b> | <b>213 cm</b> | <b>218 cm</b> | <b>223 cm</b> | <b>228 cm</b> | <b>233 cm</b> | <b>238 cm</b> |
|---------------|---------------|---------------|---------------|---------------|---------------|---------------|
| 13,17         | 15,09         | 11,78         | 10,55         | 15,42         | 13,58         | 12,38         |
| 14,4          | 11,72         | 12,87         | 13,41         | 12,81         | 11,18         | 12,92         |
| 11,07         | 15,08         | 13,22         | 13,64         | 14,25         | 12,32         | 12,79         |
| 11,74         | 13,98         | 12,61         | 13,37         | 13,87         | 12,23         | 10,56         |
| 14,15         | 15,27         | 13,58         | 14,15         | 11,6          | 11,18         | 11,01         |
| 13,71         | 13,68         | 14,87         | 11,98         | 14,55         | 11,69         | 14,06         |
| 12,65         | 13,06         | 15,04         | 11,5          | 12,36         | 13,37         | 13,68         |
| 13,3          | 13,13         | 12,74         | 10,93         | 12,63         | 12,36         | 13,01         |
| 16,23         | 13,32         | 14,27         | 12,49         | 13,64         | 12,64         | 12,53         |
| 12,88         | 14,6          | 13,08         | 12,25         | 12,32         | 11,19         | 11,72         |
| 14,7          | 13,68         | 14,52         | 13,02         | 11,82         | 11,49         | 13,43         |
| 12,43         | 13,96         | 14,25         | 11,65         | 15,19         | 10,39         | 13,64         |
| 12,93         | 14,34         | 10,65         | 13,55         | 14,87         | 13,38         | 12,95         |
| 14,67         | 9,37          | 14,03         | 13,97         | 12,72         | 13,92         | 12,23         |
| 13,19         | 16,04         | 13,48         | 12,86         | 11,83         | 14,26         | 14,84         |
| 12,38         | 11,54         | 13,01         | 13,12         | 12,59         | 11,67         | 13,69         |
| 12,91         | 12,99         | 14,3          | 11,52         | 13,42         | 10,72         | 11,94         |
| 13,69         | 14,03         | 14,46         | 11,94         | 12,58         | 9,48          | 14,76         |
| 13,91         | 14,54         | 14,59         | 11,94         | 11,84         | 14,58         | 12,3          |
| 14,74         | 12,73         | 13,31         | 13,5          | 11,42         | 14,49         | 12,87         |
| 13,12         | 9,31          | 12,18         | 12,66         | 10,87         | 12,46         | 11,57         |
| 14,07         | 12,4          | 14,65         | 12,23         | 10,27         | 12,58         | 14,07         |
| 13,96         | 14,21         | 12,65         | 11,86         | 13,11         | 14,46         | 12,16         |
| 14,39         | 12,95         | 13,9          | 14,74         | 13,61         | 12,95         | 13,53         |
| 14,56         | 13,23         | 12,88         | 11,73         | 13,03         | 10,86         | 13,25         |
| 11,59         | 7,55          | 13,91         | 13,34         | 14,17         | 13,34         | 11,45         |
| 12,61         | 12,38         | 13,54         | 13,4          | 11,82         | 13,04         | 13,65         |
| 14,8          | 15,55         | 12,83         | 11,88         | 12,76         | 8,36          | 10,59         |
| 13,13         | 11,05         | 13,81         | 13,12         | 12,36         | 11,6          | 11,29         |
| 14,43         | 15,01         | 13,42         | 12,28         | 12,05         | 12,31         | 12,8          |
| 13,58         | 12,9          | 10,99         | 13,42         | 13,88         | 11,34         | 13,54         |
| 13,3          | 11,78         | 14,82         | 12,95         | 14,63         | 13,87         | 13,1          |
| 13,14         | 12,65         | 12,13         | 12,31         | 14,18         | 13,47         | 13,72         |
| 14,95         | 13,04         | 9,9           | 10,56         | 12,6          | 10,57         | 12,42         |
| 13,53         | 11,06         | 12,69         | 12,76         | 11,7          | 14,69         | 14,97         |
| 13,43         | 12,91         | 12,74         | 13,02         | 13,33         | 13,4          | 11            |
| 15,1          | 12,45         | 15            | 12,27         | 11,7          | 14,65         | 12,85         |
| 11,19         | 12,84         | 12,71         | 11,99         | 12,79         | 13,71         | 15,42         |
| 14,42         | 12,58         | 12,7          | 12,59         | 10,34         | 11,14         | 14,22         |
| 8,42          | 13,99         | 11,29         | 11,14         | 14,42         | 14,57         | 11,64         |
| 14,17         | 12,94         | 14,71         | 13,72         | 13,19         | 11,65         | 11,4          |
| 15,37         | 12,64         | 11,72         | 12,21         | 12,53         | 12,75         | 14,4          |
| 12,46         | 13,69         | 11,78         | 12,72         | 12,67         | 13,19         | 13,83         |
| 12,74         | 13            | 12,84         | 10,81         | 13,61         | 13,83         | 14,68         |
| 14,4          | 12,25         | 14,56         | 12,23         | 14,02         | 13,35         | 10,41         |
| 14,75         | 12,77         | 7,54          | 13,36         | 13,53         | 10,91         | 13,9          |
| 13,64         | 13,42         | 13,09         | 13,69         | 13,48         | 13,93         | 12,69         |
| 15,16         | 13,25         | 13,68         | 10,84         | 12,88         | 14,18         | 12,63         |
| 14,63         | 12,93         | 12,23         | 13,46         | 10,21         | 12,14         | 13,25         |
| 12,97         | 12,48         | 12            | 13,61         | 12,38         | 14,05         | 13,08         |
| 12,51         | 12,95         | 14,11         | 13,02         | 14,57         | 11,74         | 13,21         |
| 13,44         | 12,06         | 12,65         | 10,73         | 11,78         | 12,01         | 9,32          |
| 10,29         | 13,46         | 11,88         | 15,19         | 13,56         | 12,93         | 14,54         |
| 14,5          | 11,41         | 9,92          | 13,45         | 11,25         | 12,35         | 9,5           |
| 11,79         | 13,71         | 13,51         | 8,74          | 12,32         | 13,28         | 12,21         |
| 13,34         | 12,27         | 12,51         | 12,43         | 14,14         | 12,71         | 12,93         |
| 13,83         | 14,23         | 14,56         | 11,59         | 14,42         | 13,55         | 14,6          |
| 11,53         | 14,66         | 11,61         | 12,12         | 11,55         | 12,98         | 11,92         |
| 12,41         | 12,74         | 15,29         | 11,87         | 12,8          | 12,12         | 12,67         |
| 14,19         | 16,02         | 14,77         | 10,57         | 13,34         | 13,61         | 12,66         |

|       |       |       |       |       |       |       |
|-------|-------|-------|-------|-------|-------|-------|
| 12,86 | 13,12 | 12,45 | 13,84 | 14,01 | 14,05 | 14,56 |
| 11,28 | 11,6  | 14,11 | 13,25 | 13,61 | 14,77 | 12,49 |
| 12,88 | 15,31 | 13,04 | 11,73 | 14,05 | 14,63 | 12,06 |
| 15,34 | 14,23 | 12,09 | 11,35 | 12,22 | 13,5  | 10,96 |
| 13,4  | 13,98 | 14,72 | 12,06 | 12,11 | 14,63 | 13,81 |
| 12,69 | 11,76 | 14,08 | 12,61 | 11,07 | 10,44 | 10,91 |
| 13,79 | 13,77 | 12,49 | 12,48 | 13,09 | 12,86 | 15,14 |
| 13,88 | 12,75 | 13,68 | 14,48 | 12,93 | 14,56 | 10    |
| 12,03 | 15,2  | 14,26 | 12,19 | 11,99 | 15,47 | 12,7  |
| 10,95 | 14,27 | 12,08 | 11,78 | 14,25 | 12,93 | 12,57 |
| 9,67  | 14,24 | 12,51 | 12,46 | 10,65 | 14,94 | 11,4  |
| 12,74 | 14,26 | 13,16 | 12,83 | 13,08 | 15,06 | 12,06 |
| 13,19 | 13,2  | 12,11 | 12,65 | 11,7  | 13,64 | 12,72 |
| 12,17 | 12,42 | 13,77 | 13,05 | 12,65 | 13,62 | 14,06 |
| 13,44 | 12,9  | 13,89 | 12,57 | 12,61 | 14,06 | 11,9  |
| 12,59 | 15,34 | 12,53 | 13,23 | 14,76 | 12,57 | 14,16 |
| 15,23 | 13,3  | 13,98 | 11,8  | 14,51 | 12,78 | 12,38 |
| 12,7  | 14,44 | 11,86 | 12,88 | 13,92 | 12,16 | 13,03 |
| 13,59 | 11,55 | 13,77 | 14,1  | 12,84 | 11,27 | 11,81 |
| 12,14 | 12,77 | 13,97 | 15,62 | 12,85 | 12,56 | 12,83 |
| 11,31 | 13,2  | 12,96 | 10,4  | 12,7  | 12,88 | 14,38 |
| 12,76 | 11,82 | 13,63 | 15,16 | 13,16 | 9,82  | 13,93 |
| 12,61 | 10,48 | 14,14 | 13,79 | 14,73 | 12,36 | 14,3  |
| 14,31 | 12,17 | 13,68 | 14,22 | 13,22 | 11,67 | 13,32 |
| 11,2  | 12,1  | 12,45 | 12,94 | 13,26 | 10,94 | 12,99 |
| 14,17 | 12,24 | 13,16 | 11,37 | 14,01 | 13,78 | 12,58 |
| 13,43 | 13,5  | 11,67 | 12,54 | 11,49 | 12,43 | 12,7  |
| 14,55 | 14,89 | 11,65 | 14,05 | 12,07 | 14,41 | 14,48 |
| 15,51 | 12,43 | 12,75 | 11,83 | 12,08 | 13,16 | 13,38 |
| 12,66 | 12,76 | 12,51 | 11,81 | 13,85 | 12,94 | 11,55 |
| 15,88 | 11,96 | 10,8  | 13,78 | 13,11 | 13,08 | 14,31 |
| 14,08 | 13,7  | 13,53 | 13,76 | 12,91 | 14,47 | 13,3  |
| 11,87 | 14,4  | 12,39 | 13,46 | 13,54 | 12,59 | 12,44 |
| 10,45 | 12,62 | 11,53 | 12,41 | 10,86 | 13,01 | 12,15 |
| 12,84 | 14,06 | 14,15 | 12,11 | 14,68 | 13,79 | 14,06 |
| 13,39 | 13,03 | 12,33 | 11,91 | 12,33 | 11,16 | 11,81 |
| 14,84 | 14,77 | 11,28 | 12,76 | 11,89 | 10,86 | 11,11 |
| 11,82 | 9,95  | 12,17 | 14,06 | 12,56 | 12,29 | 14,01 |
| 13,18 | 13,73 | 13,88 | 12,78 | 11,67 | 13,4  | 11,86 |
| 13,84 | 12,8  | 12,29 | 12,75 | 10,18 | 12,2  | 10,71 |

|    |    |    |    |    |    |    |
|----|----|----|----|----|----|----|
| 0  | 0  | 0  | 0  | 0  | 0  | 0  |
| 0  | 0  | 0  | 0  | 0  | 0  | 0  |
| 0  | 0  | 0  | 0  | 0  | 0  | 0  |
| 0  | 1  | 1  | 0  | 0  | 0  | 0  |
| 1  | 0  | 0  | 1  | 0  | 1  | 0  |
| 1  | 3  | 2  | 0  | 0  | 2  | 2  |
| 3  | 1  | 3  | 8  | 7  | 8  | 7  |
| 11 | 11 | 11 | 21 | 17 | 14 | 17 |
| 25 | 32 | 32 | 32 | 31 | 29 | 31 |
| 28 | 26 | 27 | 28 | 24 | 26 | 22 |
| 23 | 16 | 21 | 7  | 19 | 18 | 19 |
| 7  | 8  | 3  | 3  | 2  | 2  | 2  |
| 1  | 2  | 0  | 0  | 0  | 0  | 0  |
| 0  | 0  | 0  | 0  | 0  | 0  | 0  |

| <b>243 cm</b> | <b>249 cm</b> | <b>253 cm</b> | <b>258 cm</b> | <b>263 cm</b> | <b>268 cm</b> | <b>273 cm</b> |
|---------------|---------------|---------------|---------------|---------------|---------------|---------------|
| 12,54         | 14,3          | 13,61         | 12,07         | 12,43         | 8,75          | 9,12          |
| 13,26         | 11,57         | 12,33         | 11,79         | 7,55          | 14,73         | 6,46          |
| 13,82         | 12,32         | 13,54         | 11,17         | 8,01          | 12,78         | 13,77         |
| 11,97         | 14,73         | 13,58         | 11,94         | 10,77         | 10,78         | 5,63          |
| 14,41         | 13,6          | 10,24         | 12,35         | 10,24         | 9,81          | 10,42         |
| 12,08         | 13,31         | 11,7          | 13,34         | 7,65          | 6,1           | 14,97         |
| 11,26         | 11,2          | 11,34         | 13,31         | 14,19         | 13,45         | 9,42          |
| 13,81         | 12,65         | 11,11         | 12,79         | 7,08          | 15,14         | 14,03         |
| 14,02         | 12,76         | 13,26         | 12,45         | 13,55         | 13,26         | 13,4          |
| 12,7          | 13,03         | 14,05         | 13,13         | 12,95         | 13,01         | 7,56          |
| 12,6          | 12,08         | 12,71         | 8,69          | 8,57          | 11,98         | 14,51         |
| 14,15         | 12,53         | 11,47         | 13,62         | 12,48         | 13,3          | 9,29          |
| 12,8          | 12,26         | 12,23         | 14            | 8,29          | 13,54         | 12,19         |
| 12,55         | 12,12         | 13,27         | 12,33         |               | 12,29         | 15,59         |
| 14,37         | 13,24         | 11,77         | 12,75         |               | 14,56         | 6,2           |
| 13,7          | 14,74         | 11,65         | 15,34         |               | 6,33          |               |
| 10,48         | 12,8          | 12,81         | 14,23         |               | 10,87         |               |
| 11,57         | 12,13         | 10,39         | 11,74         |               | 14,22         |               |
| 11,45         | 11,93         | 12,62         | 11,63         |               | 13,21         |               |
| 12,42         | 13,72         | 15,49         | 13,8          |               | 12,18         |               |
| 10,81         | 8,88          | 12,69         | 11,65         |               | 12,78         |               |
| 11,04         | 13,8          | 13,01         | 10,04         |               | 14,32         |               |
| 14,57         | 12            | 13,82         | 12,1          |               | 13,44         |               |
| 14,21         | 11,98         | 11,64         | 12,8          |               | 12,67         |               |
| 13,81         | 13,43         | 12,28         | 12,71         |               | 12,51         |               |
| 14,97         | 11,7          | 12,6          | 13,82         |               | 10,08         |               |
| 13,27         | 13,59         | 12,72         | 14,27         |               | 12,77         |               |
| 13,3          | 13,3          | 13,72         | 7,42          |               | 11,02         |               |
| 13,49         | 14,17         | 11,9          | 13,29         |               | 13,58         |               |
| 14,86         | 13,04         | 12,49         | 12,42         |               | 13,49         |               |
| 13,23         | 13,42         | 11,86         | 14            |               | 11,64         |               |
| 13,74         | 11,35         | 12,4          | 11,92         |               | 12,63         |               |
| 13,34         | 11,76         | 10,85         | 7,52          |               | 15,09         |               |
| 14,15         | 11,83         | 13,04         | 14,34         |               | 13,35         |               |
| 12,83         | 12,96         | 13,6          | 14,74         |               | 11,75         |               |
| 11,47         | 11,45         | 13,51         | 12,06         |               |               |               |
| 12,21         | 12,08         | 12,69         | 12,51         |               |               |               |
| 13,28         | 10,56         | 13,12         | 13,15         |               |               |               |
| 11,13         | 13,18         | 12,82         | 11,44         |               |               |               |
| 13,78         | 13,73         | 11,2          | 15,54         |               |               |               |
| 14,59         | 13,41         | 12,51         | 11,46         |               |               |               |
| 13,18         | 14,03         | 12,49         | 13,37         |               |               |               |
| 12,02         | 12,55         | 11,37         | 8,4           |               |               |               |
| 13,51         | 14,85         | 13,66         | 14,74         |               |               |               |
| 13,06         | 12,36         | 12            | 13,85         |               |               |               |
| 12,69         | 13,45         | 11,9          | 10,68         |               |               |               |
| 13,61         | 14,09         | 11,22         | 12,48         |               |               |               |
| 13,88         | 9,99          | 13,55         | 14,5          |               |               |               |
| 13,93         | 7,71          | 12,62         | 12,48         |               |               |               |
| 12,62         | 14,56         | 13,38         | 12,09         |               |               |               |
| 12,17         | 13,73         | 10,53         | 10,59         |               |               |               |
| 10,76         | 13,4          | 14,1          | 13,61         |               |               |               |
| 10,21         | 13,6          | 13,77         | 10,11         |               |               |               |
| 14,3          | 13,99         | 13,96         | 11,76         |               |               |               |
| 12,04         | 11,95         | 13,79         | 8,73          |               |               |               |
| 14,62         | 12,09         | 13,02         | 15,96         |               |               |               |
| 13            | 15,62         | 11,98         | 15,06         |               |               |               |
| 11,8          | 11,7          | 11,79         | 10,88         |               |               |               |
| 13,09         | 14,34         | 12,71         | 13,61         |               |               |               |
| 13,44         | 13,93         | 14,09         | 13,25         |               |               |               |

|       |       |       |       |
|-------|-------|-------|-------|
| 11,99 | 11,5  | 12,33 | 13,34 |
| 9,71  | 12,45 | 13,25 | 12,28 |
| 13,03 | 13,16 | 14,45 | 14,35 |
| 12,56 | 14,14 | 11,92 | 14,47 |
| 13,57 | 14,5  | 12,65 | 12,59 |
| 11,8  | 13,14 | 11,31 | 11,98 |
| 14,76 | 11,87 | 13,14 | 10,34 |
| 13,91 | 13,87 | 12,45 | 14,15 |
| 13,69 | 13,4  | 13,59 | 12,43 |
| 12,99 | 14,16 | 12,41 | 12,92 |
| 12,39 | 16,08 | 11,25 | 13,22 |
| 14,42 | 11,29 | 14,35 | 14,68 |
| 14,16 | 12,03 | 13,69 | 12,93 |
| 12,45 | 11,81 | 14,9  | 12,88 |
| 14,32 | 11,61 | 14,16 | 14,69 |
| 13,67 | 12,01 | 12,02 | 14,5  |
| 12,67 | 11,11 | 14    | 14,48 |
| 12,17 | 13,53 | 13,26 | 11,31 |
| 11,81 | 12,45 | 7,6   | 13,87 |
| 12,57 | 13,44 | 12,4  | 12,76 |
| 12,08 | 14,15 | 14,04 | 12,74 |
| 12,91 | 12,58 | 12,61 | 12,92 |
| 11,82 | 11,33 | 13,24 | 15,81 |
| 12,4  | 11,38 | 13,95 | 11,87 |
| 11,89 | 13,12 | 12,08 | 7,61  |
| 13,06 | 13,02 | 12,58 | 13,27 |
| 12,08 | 14,23 | 12,49 | 13,56 |
| 13,9  | 12,53 | 13,04 | 13,5  |
| 12,83 | 13,85 | 12,62 | 14,18 |
| 12,65 | 13,12 | 10,2  | 13,43 |
| 12,74 | 12,27 | 13,63 | 14,58 |
| 13,19 | 14,18 | 14,76 |       |
| 12,01 | 11,21 | 12,32 |       |
| 11,21 | 13,6  | 12,75 |       |
| 13,72 | 10,83 | 12,22 |       |
| 12,71 | 14,12 | 14,29 |       |
| 12,46 | 11,25 | 13,22 |       |
| 10,76 | 10,4  | 11,62 |       |
| 13,16 | 12,35 | 13,04 |       |
| 13,5  | 13,1  | 12,94 |       |

|    |    |    |    |   |    |    |   |
|----|----|----|----|---|----|----|---|
| 0  | 0  | 0  | 0  | 0 | 0  | 0  | 0 |
| 0  | 0  | 0  | 0  | 0 | 0  | 0  | 1 |
| 0  | 0  | 0  | 0  | 0 | 0  | 2  | 2 |
| 0  | 1  | 1  | 3  | 3 | 3  | 0  | 1 |
| 0  | 1  | 0  | 3  | 3 | 3  | 1  | 0 |
| 1  | 1  | 0  | 0  | 0 | 0  | 1  | 3 |
| 5  | 3  | 5  | 6  | 2 | 3  | 3  | 1 |
| 14 | 21 | 19 | 13 | 0 | 4  | 4  | 0 |
| 31 | 23 | 33 | 24 | 3 | 8  | 8  | 1 |
| 33 | 32 | 30 | 20 | 1 | 10 | 10 | 2 |
| 16 | 16 | 11 | 17 | 1 | 4  | 4  | 3 |
| 0  | 1  | 1  | 5  | 0 | 2  | 2  | 1 |
| 0  | 1  | 0  | 0  | 0 | 0  | 0  | 0 |
| 0  | 0  | 0  | 0  | 0 | 0  | 0  | 0 |



| <b>278 cm</b> | <b>283 cm</b> | <b>288 cm</b> | <b>293 cm</b> | <b>298 cm</b> | <b>303 cm</b> | <b>308 cm</b> |
|---------------|---------------|---------------|---------------|---------------|---------------|---------------|
| 12,14         | 12,46         | 11,02         | 12,51         | 13,84         | 14,27         | 13,92         |
| 12,63         | 11,79         | 10,5          | 12,48         | 9,77          | 12,99         | 11,79         |
| 10,94         | 9,97          | 14,16         | 10,42         | 13,38         | 13,22         | 12,97         |
| 13,02         | 13,97         | 12,29         | 14,02         | 12,49         | 12,36         | 12,84         |
| 14,52         | 13,04         | 14,23         | 12,78         | 14,23         | 14,44         | 13,4          |
| 13,92         | 13,17         | 12,91         | 11,86         | 13,43         | 14,52         | 13,53         |
| 13,62         | 13,98         | 9,7           | 11,52         | 7,85          | 13,2          | 13,51         |
| 11,89         | 14,69         | 11,06         | 8,21          | 13,82         | 13,75         | 12,66         |
| 10,95         | 14,47         | 12,88         | 12,48         | 14,15         | 15,04         | 12,18         |
| 14,47         | 14,67         | 11,73         | 13,79         | 13,38         | 14,04         | 10,83         |
| 14,38         | 14,86         | 12,96         | 8,74          | 12,06         | 14,56         | 13,22         |
| 10,27         | 11,11         | 13,63         | 11,1          | 14,47         | 15,01         | 14,5          |
| 10,79         | 8,78          | 14,27         | 13,78         | 12,32         | 13,26         | 13,68         |
| 10,67         | 13,45         | 12,98         | 15,1          | 14,96         | 15,09         | 14,84         |
| 11,72         | 13,25         | 11,07         | 13,09         | 10,85         | 15,05         | 12,21         |
| 8,74          | 14,48         | 13,01         | 14,15         | 13,3          | 14,51         | 13,38         |
| 14,48         | 6,98          | 13,96         | 12,88         | 13,2          | 14,65         | 11,13         |
| 13,2          | 13,77         | 9,92          | 11,34         | 14,72         | 10,81         | 14,36         |
| 14,69         | 12,23         | 12,59         | 13,73         | 12,29         | 13,51         | 14,15         |
| 13,32         | 10,97         | 15,15         | 14,51         | 14,65         | 13,32         | 13,25         |
| 10,04         | 8,12          | 12,16         | 14,12         | 12,27         | 11,41         | 14,68         |
| 12,79         | 9,54          | 9,96          | 13,09         | 11,25         | 13,5          | 10,93         |
| 9,33          | 14,95         | 11,12         | 9,97          | 14,63         | 14,46         | 13,46         |
| 11,07         | 10,1          | 9,79          | 14,08         | 13,8          | 13,71         | 12,77         |
| 9,1           | 11,62         | 13,69         | 6,42          | 13,4          | 14,44         | 14,65         |
| 13,02         | 13,09         | 12,68         | 14,12         | 13,73         | 15,11         | 12,6          |
| 10,94         | 11,85         | 14,14         | 14,34         | 14,74         | 12,18         | 15,47         |
| 12,45         | 10,95         | 15,66         | 13,03         | 14,29         | 13,53         | 9,51          |
| 12,21         | 9,91          | 13,37         | 14,79         | 14,29         | 13,16         | 13,35         |
| 11,42         | 8,68          | 12,96         | 13,34         | 12,83         | 14,78         | 13,06         |
| 10,51         | 14,38         | 14,98         | 6,5           | 13,33         | 13,95         | 13,5          |
| 12,04         | 11,52         | 9,59          | 13,12         | 14,6          | 15,41         | 11,29         |
| 10,41         | 8,72          | 9,97          | 11,63         | 14,22         | 13,36         | 13,9          |
| 11,99         | 12,95         | 10,77         | 12,67         | 14,03         | 14,26         | 12,74         |
| 13,21         | 11,86         | 11,1          | 13,01         | 13,73         | 15,49         | 12,54         |
| 11,66         | 7,71          | 14,51         | 12,76         | 14,54         | 13,55         | 13,61         |
| 10,59         | 8,59          | 14,72         | 12,35         | 14,64         | 14,46         | 12,2          |
| 11,02         | 10,08         | 14,23         | 9,36          | 12,4          | 14,55         | 14,64         |
| 12,18         | 14,77         | 14,81         | 14,67         | 11,42         | 15,19         | 13,7          |
| 7,01          | 13,4          | 10,1          | 13,49         | 6,96          | 14,78         | 14,16         |
| 15,33         | 11,97         | 11,22         | 13,16         | 14,75         | 15,25         | 15,04         |
| 12,12         | 12,91         | 12,88         | 15            | 11,95         | 13,21         | 13,07         |
| 9,14          | 14,81         | 11,31         | 13,66         | 14,78         | 14,53         | 14,42         |
| 12,07         | 12,45         | 13,8          | 6,6           | 13,97         | 11,71         | 12,12         |
| 9,85          | 14,35         | 11,88         | 12,8          | 14,86         | 14,58         | 13,31         |
| 8,15          | 12,96         | 10,4          | 13,75         | 12,94         | 12,6          | 14,34         |
| 14,04         | 13,64         | 9,77          | 15,02         | 14,06         | 13,05         | 13,19         |
| 15,59         | 9,57          | 9,82          | 12,18         | 14,29         | 12,83         | 14,25         |
| 11,4          | 11,86         | 13,97         | 15,53         | 12,55         | 14,97         | 11,84         |
| 13,36         | 11,14         | 8,02          | 14,82         | 13,67         | 14,66         | 13,34         |
| 12,21         | 10,41         | 10,57         | 13,26         | 12,46         | 14,54         | 13,04         |
| 13,49         | 9,92          | 9,23          | 13,78         | 9,72          | 15,1          | 14,56         |
| 13,74         | 13,12         | 9,92          | 13,15         | 11,74         | 14,89         | 12,96         |
| 11,91         | 13,91         | 14,29         | 8,4           | 10,89         | 13,12         | 12,7          |
| 9,71          | 11,11         | 13,09         | 14,04         | 13,75         | 11,15         | 11,79         |
| 8,88          | 15            | 14,72         | 13,02         | 12,35         | 14,77         | 14,81         |
| 11,25         | 12,95         | 9,37          | 13,49         | 14,05         | 14,32         | 14,5          |
| 12,28         | 12,62         | 15,34         | 13,12         | 8,12          | 13,21         | 14,85         |
| 12            | 13,4          | 13,27         | 9,37          | 14,36         | 13,37         | 12,72         |
| 12,32         | 11,68         | 9,77          | 11,47         | 12,72         | 13,59         | 14,17         |

|       |       |       |       |       |       |       |
|-------|-------|-------|-------|-------|-------|-------|
| 11,51 | 12,01 | 12,73 | 13,81 | 13,68 | 16,61 | 13,34 |
| 9,19  | 10,89 | 11,35 | 14,52 | 15,82 | 12,79 | 13,68 |
| 13,7  | 13,12 | 7,84  | 7,18  | 12,36 | 14,34 | 13,3  |
| 13,82 | 14,99 | 14,84 | 13,31 | 13,81 | 12,39 | 12,32 |
| 7,64  | 14,72 | 9,11  | 9,68  | 11,6  | 12,41 | 11,85 |
| 13,31 | 10,08 | 13,19 | 13,32 | 14,68 | 13,91 | 14,25 |
| 10,7  | 13,24 | 13,8  | 9,37  | 11,79 | 15,62 | 12,18 |
| 14,28 | 15,06 | 11,79 | 13,13 | 11,27 | 16,28 | 13,96 |
| 9,09  | 13,97 | 12,72 | 12,83 | 14,52 | 14,44 | 14,44 |
| 10,48 | 8,54  | 12,88 | 9,82  | 12,95 | 14,51 | 13,36 |
| 14,1  | 13,54 | 11,78 | 10,99 | 14,94 | 13,34 | 12,32 |
| 13,37 | 11,69 | 9,87  | 11,74 | 12,92 | 12,6  | 12,83 |
| 13,72 | 9,58  | 13,44 | 13,1  | 11,84 | 12,55 | 13,01 |
| 13,8  | 8,83  | 13,1  | 12,81 | 13,58 | 13,54 | 13,11 |
| 9,42  | 14,92 | 13,32 | 12,57 | 14,88 | 12,46 | 13,27 |
| 11,46 | 12,75 | 9,83  | 14,5  | 12,17 | 12,32 | 13,45 |
| 11,4  | 11,65 | 14,06 | 12,67 | 14,64 | 14,82 | 15,62 |
| 15,02 | 13,02 | 14,37 | 14,1  | 11,78 | 12,55 | 14,29 |
| 12,16 | 13,81 | 9,86  | 11,33 | 13,52 | 13,67 | 13,06 |
| 10,88 | 13,09 | 14,73 | 13,51 | 11,64 | 14,29 | 12,81 |
| 12,99 | 11,95 | 11,48 | 12,15 | 12,88 | 14,47 | 11,96 |
| 15,23 | 12,02 | 11,04 | 14,51 | 13,78 | 13,51 | 12,49 |
| 13,34 | 14,57 | 12,81 | 14,23 | 15,22 | 15,39 | 14,02 |
| 9,06  | 14,32 | 11,94 | 14,94 | 13,48 | 15,02 | 12,03 |
| 12,54 | 10,71 | 14,36 | 13,81 | 13,41 | 13,73 | 12,35 |
| 9,28  |       | 14,46 | 13,32 | 13,6  | 12,53 | 14,34 |
| 13,02 |       | 16,04 | 13,47 | 13,17 | 13,95 | 14,05 |
| 13,06 |       | 15,03 | 11,74 | 12,08 | 13,94 | 5,71  |
| 14,35 |       | 13,07 | 12,04 | 14,3  | 12,74 | 14,93 |
| 8,06  |       | 10,62 | 13,88 | 7,62  | 12,74 | 12,87 |
| 14,53 |       | 8,77  | 12,69 | 14,04 | 12,59 | 12,94 |
| 12,23 |       | 14,75 | 12,09 | 14,08 | 14,08 | 14,29 |
| 13,49 |       | 11,89 | 14,1  | 13,73 | 15,67 | 13,92 |
| 10,67 |       | 12,57 | 9,82  | 14,6  | 13,55 | 14,12 |
| 14,18 |       | 11,83 | 13,16 | 14,72 | 8,6   | 13,23 |
| 12,25 |       | 12,45 | 14,63 | 14,75 | 12,41 | 13,6  |
| 13,41 |       | 14,54 | 13,29 | 14,14 | 12,89 | 14,49 |
| 12,91 |       | 7,6   | 10,42 | 14,37 | 15,85 | 13,66 |
| 12,42 |       | 8,88  | 13,33 | 14,62 | 10,74 | 11,54 |
| 9,48  |       | 8,24  | 5,97  | 14,71 | 12,72 | 15,32 |

|    |    |    |    |    |    |    |
|----|----|----|----|----|----|----|
| 0  | 0  | 0  | 0  | 0  | 0  | 0  |
| 0  | 0  | 0  | 1  | 0  | 0  | 1  |
| 0  | 1  | 0  | 3  | 1  | 0  | 0  |
| 2  | 1  | 2  | 1  | 2  | 0  | 0  |
| 4  | 7  | 4  | 3  | 1  | 1  | 0  |
| 11 | 6  | 16 | 7  | 2  | 0  | 1  |
| 14 | 8  | 6  | 3  | 2  | 2  | 2  |
| 13 | 14 | 17 | 9  | 10 | 3  | 8  |
| 20 | 11 | 16 | 18 | 18 | 20 | 24 |
| 21 | 20 | 15 | 32 | 25 | 28 | 34 |
| 11 | 15 | 19 | 19 | 37 | 29 | 26 |
| 4  | 2  | 4  | 4  | 2  | 15 | 4  |
| 0  | 0  | 1  | 0  | 0  | 2  | 0  |
| 0  | 0  | 0  | 0  | 0  | 0  | 0  |

| <b>313 cm</b> | <b>318 cm</b> | <b>323 cm</b> | <b>328 cm</b> | <b>333 cm</b> | <b>338 cm</b> | <b>343 cm</b> |
|---------------|---------------|---------------|---------------|---------------|---------------|---------------|
| 12,04         | 13,15         | 13,53         | 14,72         | 13,93         | 7,3           | 8,61          |
| 12,75         | 14,9          | 13,01         | 14,34         | 13,08         | 14,77         | 9,55          |
| 10,32         | 12,29         | 13,54         | 13,58         | 13,7          | 7,64          | 9,55          |
| 13,97         | 13,72         | 13,56         | 12,84         | 12,86         | 12,72         | 11,95         |
| 14,98         | 14,08         | 12,68         | 13,88         | 12,95         | 13,39         | 14,03         |
| 12,09         | 11,78         | 14,97         | 13,16         | 14,75         | 15,86         | 14,5          |
| 12,2          | 14,28         | 13,13         | 12,16         | 13,98         | 13,97         | 7,88          |
| 12,74         | 12,45         | 13,61         | 13,4          | 14,08         | 11,21         | 13,81         |
| 13,88         | 12,81         | 11,21         | 13,47         | 13,69         | 13,09         | 7,74          |
| 13,13         | 10,93         | 13,8          | 14,05         | 14,3          | 11,49         | 9,1           |
| 12,95         | 11,67         | 14,51         | 13,94         | 15,42         | 16,38         | 13,28         |
| 15,03         | 11,95         | 13,43         | 14,86         | 14,34         | 12,09         | 13,62         |
| 12,88         | 10,85         | 15            | 13,42         | 14,67         | 13,3          | 13,31         |
| 12,82         | 14,68         | 12,63         | 12,66         | 12,36         | 14,88         | 14,7          |
| 9,93          | 14,37         | 13,22         | 14,51         | 12,58         | 10,72         | 13,22         |
| 14,74         | 12,82         | 12,56         | 13,31         | 12,93         | 12,64         | 13,59         |
| 13,34         | 13            | 13,05         | 14,04         | 13,37         | 14,45         | 6,82          |
| 12,79         | 12,55         | 12,63         | 12,72         | 12,64         | 9,82          | 6,7           |
| 15,02         | 13,56         | 12,81         | 14,19         | 7,97          | 12,93         | 13,82         |
| 14,25         | 13,62         | 15,09         | 14,29         | 15,17         | 8,91          | 14,35         |
| 13,26         | 12,17         | 14,78         | 14,49         | 13,86         | 11,25         | 15,43         |
| 12,32         | 11,66         | 13,48         | 13,82         | 14,24         | 10,29         | 7,08          |
| 14,17         | 10,89         | 14,44         | 11,56         | 14,15         | 13,29         | 10,07         |
| 13,94         | 13,13         | 12,58         | 11,74         | 14,73         | 13,65         | 10,94         |
| 15,05         | 14,65         | 13,68         | 12,95         | 14,96         | 12,36         | 14,81         |
| 14,22         | 15,19         | 14,15         | 14,42         | 15,03         | 11,85         | 14,59         |
| 9,74          | 12,28         | 12,57         | 16,33         | 13,9          | 11,15         | 14,96         |
| 10,89         | 12,99         | 14,2          | 14,69         | 14,74         | 12,25         | 8,69          |
| 10,69         | 15,54         | 12,61         | 13,84         | 15,4          | 12,43         | 15,91         |
| 15,36         | 12,63         | 13,03         | 13,16         | 13,31         | 14,77         | 14,08         |
| 14,53         | 13,31         | 14,37         | 13,9          | 8,06          | 7,43          | 11,61         |
| 11,43         | 13,79         | 12,14         | 14,51         | 10,81         | 12,29         | 10,15         |
| 11,82         | 12,29         | 13,56         | 13,9          | 14,19         | 12,61         | 7,72          |
| 13,29         | 14,54         | 14,79         | 14,52         | 14,64         | 13,24         | 12,19         |
| 13,13         | 12,93         | 7,82          | 14,93         | 12,69         | 13,16         | 8,36          |
| 13,24         | 13,73         | 12,79         | 14,59         | 12,17         | 12,61         | 6,38          |
| 13,54         | 12,34         | 13,03         | 13,42         | 11,95         | 11,55         | 13,33         |
| 13,95         | 14,37         | 14,26         | 12,61         | 13,29         | 12,99         | 6,93          |
| 14,34         | 14,74         | 15,25         | 14,54         | 14,87         | 7,17          | 14,27         |
| 11,79         | 12,95         | 13,96         | 12,8          | 12,5          | 13,59         | 14,05         |
| 12,79         | 11,7          | 12,45         | 11,74         | 14,53         | 14,41         | 15,19         |
| 10,95         | 15,03         | 15,76         | 13,71         | 12,72         | 13,05         | 8,15          |
| 14,31         | 11,52         | 13,64         | 12,91         | 13,08         | 7,37          | 9,5           |
| 12,5          | 15,61         | 14,79         | 10,95         | 16,1          | 14,73         | 13,46         |
| 14,81         | 13,28         | 13,84         | 13,45         | 14,42         | 14,08         | 14,36         |
| 12,84         | 12,19         | 14,49         | 14,92         | 11,72         | 10,47         | 14,17         |
| 14,65         | 15,58         | 12,84         | 13,22         | 13,45         | 9,37          | 9,34          |
| 12,56         | 12,57         | 10,48         | 13,57         | 13,11         | 12,82         | 13,83         |
| 11,71         | 12,56         | 13,88         | 15,64         | 14,03         | 13,6          | 13,87         |
| 6,81          | 12,75         | 13,55         | 14,03         | 12,08         | 14,62         | 12,42         |
| 13,81         | 13,43         | 14,72         | 10,58         | 14,92         | 6,44          | 15,7          |
| 14,44         | 10,29         | 15,62         | 13,73         | 15,56         | 13,1          | 13,89         |
| 13,46         | 11,61         | 11,7          | 14,14         | 12,67         | 12,06         | 13,44         |
| 13,75         | 11,59         | 14,53         | 11,3          | 14,07         | 12,66         | 7,16          |
| 12,76         | 12,61         | 15,76         | 11,54         | 14,3          | 12,56         | 14,12         |
| 14,08         | 13,83         | 14,27         | 10,1          | 16,05         | 14,35         | 9,88          |
| 15,31         | 12,88         | 15,1          | 13,04         | 11,19         | 13,89         | 15,83         |
| 14,16         | 16,28         | 13,5          | 14,61         | 14,48         | 11,56         | 13,55         |
| 14,56         | 12,43         | 13,59         | 13,48         | 10,44         | 13,08         | 7,36          |
| 14,65         | 11,19         | 11,77         | 12,45         | 12,58         | 11,6          | 10,3          |

|       |       |       |       |       |       |       |
|-------|-------|-------|-------|-------|-------|-------|
| 12,65 | 13,03 | 11,64 | 12,61 | 8,39  | 7,9   | 14,79 |
| 14,07 | 13,05 | 14,18 | 14,66 | 13,79 | 14,44 | 9,25  |
| 13,59 | 13,2  | 13,15 | 15,01 | 15,31 | 7,48  | 10,4  |
| 12,45 | 13,61 | 11,73 | 14,5  | 14,31 | 15,2  | 12,95 |
| 11,43 | 13,84 | 13    | 14,01 | 11,59 | 12,64 | 9,56  |
| 13,25 | 16,31 | 14,75 | 12,28 | 14,55 | 13,59 | 12,42 |
| 14,46 | 13,67 | 14,04 | 12,77 | 13,01 | 11,45 | 10,68 |
| 12,17 | 14,15 | 12,69 | 14,82 | 13,68 | 15,61 | 14,03 |
| 14,09 | 13,43 | 12,3  | 13,77 | 11,93 | 9,37  | 10,87 |
| 14,41 | 11,38 | 12,42 | 13,12 | 13,19 | 11,49 | 6,04  |
| 11,9  | 14,97 | 11,34 | 14,51 | 14,11 | 12,38 | 12,9  |
| 12,8  | 14    | 11,73 | 12,79 | 9,84  | 15,31 | 14,31 |
| 13,38 | 8,93  | 13,53 | 13,96 | 12,85 | 9,46  | 12,32 |
| 13,17 | 15,03 | 14,48 | 14,44 | 14,67 | 12,93 | 8,36  |
| 11,73 | 12,22 | 13,5  | 13,08 | 13,72 | 13,65 | 15,56 |
| 13,25 | 13,78 | 12,99 | 13,59 | 14,52 | 12,02 | 7,94  |
| 12,14 | 14,69 | 13,21 | 12,91 | 11,38 | 9,81  | 11,16 |
| 11,37 | 11,26 | 13,03 | 13,26 | 12,91 | 14,91 | 11,65 |
| 14,06 | 12,29 | 11,7  | 14,47 | 14,49 | 7,9   | 9,51  |
| 11,31 | 15,02 | 13,83 | 16,15 | 15,19 | 11,94 | 8,92  |
| 13,71 | 13,46 | 13,14 | 13,17 | 15,09 | 11,13 | 13,16 |
| 11,27 | 12,78 | 7,85  | 14,29 | 15,43 | 14,89 | 6,06  |
| 14,71 | 7,3   | 14,65 | 14,39 | 14,54 | 13,88 | 15,02 |
| 12,43 | 14,19 | 12,62 | 12,29 | 12,9  | 13,63 | 13,95 |
| 12,52 | 11,26 | 15,36 | 13,24 | 14,23 | 13,64 | 12,48 |
| 14,68 | 13,02 | 13,51 | 14,35 | 14,86 | 11,8  | 13,56 |
| 12,17 | 12,79 | 13,42 | 13,41 | 14,67 | 13,83 | 13,23 |
| 10,25 | 11,98 | 12,02 | 14,39 | 13,14 | 13,5  | 6,96  |
| 11,6  | 10,88 | 15,53 | 12,97 | 12,43 | 12,09 | 7,55  |
| 13,14 | 10,96 | 12,27 | 13,04 | 12,09 | 14,68 | 5,46  |
| 14,77 | 12,87 | 14,42 | 10,22 | 15,02 | 14,89 | 12,43 |
| 13,56 | 13,47 | 14,79 | 14,42 | 10,09 | 13,02 | 12,99 |
| 14,23 | 13,43 | 14,6  | 13,55 | 14,91 | 6,69  | 6,67  |
| 15,23 | 14,21 | 13,97 | 13,7  | 15,11 | 13,32 | 14,63 |
| 13,3  | 14,42 | 8,31  | 6,5   | 14,68 | 13,36 | 12,54 |
| 13,35 | 10,48 | 11,28 | 13,79 | 13,77 | 12,71 | 12,02 |
| 10,25 | 13,51 | 13,5  | 8,02  | 12,58 | 7,74  | 13,71 |
| 12,85 | 14,29 | 15,03 | 12,25 | 10,93 | 14,63 | 8,33  |
| 11,95 | 11,61 | 14,07 | 12,45 | 13,71 | 12,45 | 10,42 |
| 14,22 | 14,69 | 13,08 | 13,26 | 12,63 | 11,81 | 9,04  |

|    |    |    |    |    |    |    |
|----|----|----|----|----|----|----|
| 0  | 0  | 0  | 0  | 0  | 0  | 0  |
| 0  | 0  | 0  | 0  | 0  | 0  | 1  |
| 1  | 0  | 0  | 1  | 0  | 2  | 8  |
| 0  | 1  | 2  | 0  | 1  | 9  | 8  |
| 0  | 1  | 1  | 1  | 2  | 1  | 7  |
| 2  | 0  | 0  | 0  | 1  | 5  | 10 |
| 6  | 7  | 1  | 4  | 4  | 3  | 8  |
| 12 | 14 | 9  | 5  | 6  | 14 | 4  |
| 24 | 25 | 19 | 18 | 20 | 22 | 11 |
| 24 | 25 | 35 | 35 | 21 | 24 | 19 |
| 25 | 18 | 23 | 32 | 32 | 15 | 17 |
| 6  | 7  | 10 | 2  | 11 | 4  | 7  |
| 0  | 2  | 0  | 2  | 2  | 1  | 0  |
| 0  | 0  | 0  | 0  | 0  | 0  | 0  |

| <b>348 cm</b> | <b>353 cm</b> | <b>358 cm</b> | <b>363 cm</b> | <b>368 cm</b> | <b>373 cm</b> | <b>378 cm</b> |
|---------------|---------------|---------------|---------------|---------------|---------------|---------------|
| 13,06         | 14,86         | 14,35         | 14,01         | 12,78         | 15,68         | 16,04         |
| 12,26         | 15,17         | 13,58         | 10            | 15,02         | 15,45         | 15,75         |
| 14,04         | 14,18         | 14            | 13,4          | 14,17         | 14,61         | 12,07         |
| 14,53         | 13,12         | 14,14         | 13,91         | 13,61         | 12,06         | 12,88         |
| 13,68         | 6,66          | 11,91         | 13,43         | 13,92         | 13,61         | 14,8          |
| 14,62         | 14,26         | 14,64         | 15,28         | 14,66         | 11,92         | 11,05         |
| 15,19         | 12,45         | 12,9          | 13,68         | 12,93         | 11,74         | 12,07         |
| 13,55         | 13,77         | 11,7          | 12,15         | 16,33         | 15,17         | 14            |
| 15,31         | 14,04         | 11,94         | 13,73         | 14,52         | 13,67         | 12,52         |
| 13,95         | 15,22         | 12,32         | 6,66          | 6,38          | 14,28         | 14,58         |
| 8,32          | 12,18         | 13,51         | 12,14         | 15,58         | 13,89         | 15,6          |
| 10,4          | 13,13         | 14,7          | 14,07         | 14,06         | 12,61         | 14,76         |
| 13,88         | 12,97         | 11,35         | 13,39         | 15,33         | 14,91         | 14,37         |
| 12,93         | 7,12          | 13,97         | 13,71         | 14,67         | 13,14         | 14,79         |
| 14,41         | 15,04         | 13,47         | 14,54         | 12,62         | 12,33         | 13,77         |
| 5,17          | 5,97          | 12,91         | 12,78         | 13            | 15,06         | 13,1          |
| 7,81          | 12,95         | 13,53         | 12,9          | 14,72         | 15,02         | 16,12         |
| 14,52         | 12,82         | 14            | 14,57         | 14,88         | 13,43         | 16,2          |
| 15,32         | 15,04         | 11,53         | 13,36         | 14,65         | 9,94          | 14,89         |
| 13,13         | 15,28         | 14,15         | 14,18         | 13,71         | 14,68         | 15,31         |
| 9,72          | 15,25         | 13,05         | 12,32         | 16,21         | 12,79         | 12,75         |
| 8,11          | 14,3          | 15,2          | 12,61         | 14,92         | 15,05         | 13,2          |
| 14,73         | 14,95         | 9,64          | 13,78         | 13,41         | 13,58         | 14,77         |
| 14,12         | 14,01         | 13,57         | 13,39         | 15,06         | 16,89         | 15,04         |
| 10,68         | 14,62         | 6,26          | 14,17         | 12,11         | 15,57         | 11,89         |
| 13,89         | 12,36         | 13,57         | 13,68         | 12,7          | 15,35         | 14,4          |
| 12,84         | 15,12         | 14,73         | 11,97         | 15,36         | 16,19         | 15,42         |
| 14            | 7,91          | 12,96         | 14,45         | 15,01         | 12,83         | 14,12         |
| 13,79         | 13,81         | 13,22         | 15,08         | 13,64         | 15,61         | 7,82          |
| 14,27         | 14,92         | 12,61         | 12,73         | 14,63         | 13,21         | 14,34         |
| 9,13          | 12,62         | 15,67         | 13,67         | 16,23         | 15,45         | 13,69         |
| 6,46          | 13,24         | 14,05         | 13,07         | 15,06         | 13,22         | 15,57         |
| 14,7          | 14,06         | 11,88         | 12,47         | 12,98         | 13,23         | 14,86         |
| 15,29         | 15            | 14,46         | 14,68         | 14,19         | 14,76         | 12,2          |
| 8,24          | 14,84         | 12,06         | 10,93         | 13,81         | 15,62         | 13,89         |
| 15,56         | 14,21         | 12,14         | 12,42         | 13,87         | 14,77         | 14,07         |
| 14,64         | 16,09         | 14,27         | 13,31         | 15,32         | 12,67         | 13,46         |
| 14,47         | 13,11         | 16,53         | 14,97         | 11,7          | 15,34         | 11,22         |
| 17,22         | 15,04         | 15,19         | 15,43         | 14,74         | 7,69          | 13,37         |
| 12,8          | 9,05          | 14,21         | 14,92         | 15,59         | 13,74         | 10,76         |
| 14,35         | 16,09         | 13,96         | 13,23         | 15,32         | 13,93         | 15,39         |
| 13,37         | 13,97         | 13,5          | 13,43         | 14,04         | 14,49         | 12,02         |
| 13,04         | 13,8          | 14,03         | 11,88         | 14,3          | 15,23         | 14,62         |
| 8,35          | 12,03         | 15,38         | 12,24         | 12,53         | 7,39          | 12,22         |
| 15,4          | 13,49         | 14,23         | 11,99         | 14,53         | 12,56         | 14,17         |
| 12,44         | 14,24         | 16,77         | 12,93         | 14,63         | 12,93         | 16,22         |
| 13,16         | 14,78         | 13,08         | 10,33         | 15,63         | 13,28         | 16,54         |
| 14,73         | 14,81         | 12,89         | 14,25         | 14,29         | 16,02         | 12,83         |
| 14,82         | 14,04         | 12,71         | 13,16         | 14,2          | 13,59         | 14,21         |
| 13,85         | 14,63         | 12,84         | 13,35         | 13,56         | 13,94         | 14,08         |
| 14,58         | 12,56         | 13,13         | 12,23         | 14,48         | 13,94         | 15,35         |
| 10,11         | 13,21         | 12,95         | 14,81         | 13,63         | 7,51          | 13,11         |
| 11,31         | 13,9          | 14,53         | 14,57         | 15,14         | 12,51         | 15,85         |
| 7,94          | 15,25         | 14,67         | 11,06         | 15,28         | 14,19         | 14,69         |
| 14,91         | 6,72          | 13,79         | 13,42         | 11,94         | 15,39         | 7,2           |
| 7,34          | 12,42         | 14,66         | 11,19         | 13,38         | 14,86         | 10,26         |
| 15,53         | 14,19         | 15,99         | 11,08         | 12,53         | 14,25         | 8,01          |
| 7,27          | 13,4          | 14,77         | 14,49         | 14,49         | 15,14         | 11,57         |
| 15,61         | 13,42         | 14,53         | 15,42         | 14,94         | 14,18         | 11,15         |
| 8,69          | 13,46         | 14,8          | 12,29         | 16,18         | 14,98         | 14,68         |

|       |       |       |       |       |       |       |
|-------|-------|-------|-------|-------|-------|-------|
| 11,69 | 11,44 | 12,05 | 12,83 | 15,89 | 13,88 | 14,71 |
| 6,3   | 12,32 | 15,57 | 14,16 | 8,94  | 15,34 | 15,67 |
| 13,02 | 13,08 | 13,71 | 16,34 | 15,18 | 8,25  | 16,01 |
| 9,89  | 7,19  | 13,5  | 14,85 | 11,8  | 15,26 | 14,17 |
| 13,07 | 6,49  | 13,23 | 14,78 | 14,27 | 12,45 | 13,7  |
| 14,07 | 12,19 | 14,74 | 13,54 | 14,99 | 13,9  | 14,34 |
| 14,86 | 7,5   | 9,01  | 15,79 | 14,23 | 8,41  | 15,17 |
| 6,18  | 13,48 | 13,85 | 12,22 | 13,31 | 9,08  | 14,05 |
| 6,08  | 14,51 | 13,87 | 14,83 | 14,52 | 13,24 | 12,8  |
| 14,26 | 15,76 | 14,92 | 15,23 | 14,4  | 14,06 | 13,42 |
| 7,28  | 12,29 | 16,24 | 14,36 | 15,74 | 13,96 | 12,85 |
| 14,94 | 12,21 | 14,56 | 14,66 | 9,69  | 13,19 | 13,4  |
| 12,85 | 14,07 | 13,94 | 16,36 | 16    | 13,69 | 14,93 |
| 11,6  | 14,61 | 14,64 | 15,31 | 14,76 | 13,43 | 13,2  |
| 9,14  | 13,65 | 11,41 | 12,17 | 16,34 | 14,46 | 15,04 |
| 6,1   | 13,79 | 14,32 | 14,26 | 14,27 | 11,49 | 13,29 |
| 15,29 | 12,7  | 12,59 | 14,36 | 13,3  | 9,67  | 13,93 |
| 14,42 | 13,87 | 13,13 | 14,34 | 14,33 | 14,07 | 15,91 |
| 10,68 | 11,98 | 12,03 | 13,93 | 13,04 | 14,27 | 14,5  |
| 14,81 | 13,88 | 7,64  | 14,48 | 7,73  | 15,39 | 14,14 |
| 12,2  | 12,4  | 12,54 | 15,63 | 14,4  | 14,73 | 15,35 |
| 14,86 | 13,26 | 14,15 | 13,14 | 13,81 | 15,29 | 6,93  |
| 14,4  | 15,01 | 13,13 | 15,45 | 13,82 | 15,1  | 13,6  |
| 11,53 | 12,72 | 15,08 | 13,4  | 13,49 | 15,4  | 12,68 |
| 12,41 | 13,99 | 12,75 | 12,61 | 14,72 | 14,57 | 12,8  |
| 13,61 | 12,96 | 14,54 | 11,73 | 12,6  | 14,8  | 14,14 |
| 11,34 | 13,59 | 14,63 | 13,06 | 13,15 | 15,1  | 13,3  |
| 14,99 | 14,03 | 12,99 | 12,55 | 15,53 | 12,62 | 12,25 |
| 16,83 | 13,06 | 12,47 | 12,06 | 15,96 | 15,82 | 16,06 |
| 8,78  | 15,07 | 13,98 | 13,9  | 15,65 | 14,6  | 15,57 |
| 10,15 | 16,49 | 12,02 | 14,5  | 14,23 | 12,66 | 15,5  |
| 12,69 | 13,3  | 13,83 | 13,23 | 12,17 | 15,3  | 14,32 |
| 15,11 | 15,43 | 15,2  | 6     | 13,02 | 14,76 | 15,96 |
| 12,78 | 14,62 | 13,45 | 12,66 | 13,88 | 16,11 | 13,5  |
| 7,38  | 13,61 | 9,16  | 13,74 | 13,25 | 14,95 | 13,51 |
| 15,11 | 14,15 | 12,12 | 11,44 | 14,8  | 15,12 | 12,45 |
| 13,63 | 8,68  | 15,63 | 13,78 | 12,91 | 13    | 15,16 |
| 15,53 | 13,67 | 13,65 | 12,73 | 13,15 | 15,97 | 15,37 |
| 15,28 | 10,66 | 15,21 | 14,53 | 11,34 | 13,25 | 14,54 |
| 6,61  | 13,71 | 14,03 | 13,38 | 13,23 | 15,74 | 14,78 |

|    |    |    |    |    |    |    |
|----|----|----|----|----|----|----|
| 0  | 0  | 0  | 0  | 0  | 0  | 0  |
| 1  | 1  | 0  | 0  | 0  | 0  | 0  |
| 6  | 3  | 1  | 2  | 1  | 0  | 1  |
| 6  | 4  | 1  | 0  | 1  | 3  | 2  |
| 6  | 1  | 0  | 0  | 1  | 2  | 1  |
| 4  | 1  | 3  | 0  | 1  | 3  | 0  |
| 5  | 1  | 0  | 3  | 0  | 0  | 2  |
| 5  | 2  | 7  | 8  | 4  | 3  | 5  |
| 10 | 18 | 20 | 21 | 11 | 12 | 15 |
| 16 | 28 | 26 | 29 | 23 | 24 | 18 |
| 26 | 24 | 29 | 26 | 33 | 22 | 30 |
| 13 | 14 | 10 | 9  | 19 | 27 | 19 |
| 1  | 3  | 3  | 2  | 6  | 4  | 7  |
| 1  | 0  | 0  | 0  | 0  | 0  | 0  |

| <b>383 cm</b> | <b>388 cm</b> | <b>393 cm</b> | <b>398 cm</b> | <b>403 cm</b> | <b>408 cm</b> | <b>413 cm</b> |
|---------------|---------------|---------------|---------------|---------------|---------------|---------------|
| 14,82         | 14,62         | 13,71         | 14,35         | 12,42         | 13,59         | 13,07         |
| 14,82         | 15,81         | 16,3          | 15,58         | 14,65         | 12,83         | 14,78         |
| 13,56         | 12,66         | 13,71         | 16,8          | 13,56         | 10,76         | 12,53         |
| 14,74         | 14,12         | 14,94         | 13,34         | 12,91         | 16,21         | 13,77         |
| 14,62         | 12,25         | 12,01         | 13,32         | 12,01         | 12,28         | 11,9          |
| 11,9          | 14,76         | 16,31         | 14,11         | 13,48         | 12,11         | 14,68         |
| 15,89         | 13,55         | 11,75         | 13,08         | 14,68         | 12,61         | 14,21         |
| 12,68         | 12,91         | 14,04         | 15,28         | 14,05         | 13,05         | 15,13         |
| 13,94         | 12,96         | 14,05         | 14,16         | 14,79         | 13,9          | 12,85         |
| 14,25         | 14,43         | 14,65         | 14,83         | 10,15         | 11,29         | 13,5          |
| 13,61         | 13,46         | 14,61         | 13,55         | 15,09         | 11,26         | 7,13          |
| 14,55         | 14,33         | 15,8          | 14,37         | 12,84         | 10,27         | 12,66         |
| 9,68          | 13,78         | 12,56         | 12,53         | 14,15         | 13,34         | 12,56         |
| 16,6          | 10,77         | 12,49         | 11,07         | 8,71          | 14,34         | 14,78         |
| 14,34         | 11,14         | 14,03         | 13,92         | 15,28         | 13,98         | 12,77         |
| 14,76         | 12,24         | 14,66         | 13,79         | 14,82         | 12,41         | 14,55         |
| 14,77         | 13,53         | 13,54         | 13,63         | 14,12         | 14,66         | 14,8          |
| 14,73         | 15,11         | 14,49         | 13,19         | 14,08         | 13,87         | 13,92         |
| 13,31         | 15,17         | 13,92         | 15,49         | 11,81         | 14,88         | 13,88         |
| 11,9          | 13,81         | 14,4          | 12,98         | 12,69         | 13,22         | 15,03         |
| 15,17         | 14,65         | 12,06         | 14,95         | 13,24         | 15,15         | 12,98         |
| 13,59         | 15,78         | 13,73         | 13,06         | 14            | 13,78         | 11,82         |
| 15,42         | 14,38         | 13,41         | 12,77         | 12,75         | 10,86         | 13,5          |
| 12,32         | 13,87         | 14,6          | 13,87         | 13,45         | 14,81         | 14,1          |
| 10,05         | 15,14         | 14,84         | 12,69         | 15,57         | 13,56         | 13,96         |
| 14,54         | 14,06         | 13,71         | 15,4          | 11,95         | 14,86         | 11,91         |
| 14,41         | 13,74         | 13,33         | 13,8          | 12,11         | 9,92          | 15,03         |
| 10,08         | 14,49         | 12,3          | 14,57         | 13,62         | 13,1          | 13,08         |
| 13,28         | 15,22         | 14,68         | 16,08         | 12,4          | 11,61         | 14,82         |
| 13,47         | 12,91         | 14,57         | 13,62         | 12,89         | 13,86         | 15,28         |
| 16,08         | 6,73          | 12,23         | 11,84         | 11,73         | 10,68         | 14,59         |
| 15,56         | 14,18         | 13,36         | 13,5          | 12,42         | 13,56         | 15,44         |
| 15,85         | 12,74         | 14,78         | 15,66         | 13,62         | 14,24         | 15,02         |
| 14,8          | 15,32         | 14,49         | 15,73         | 10,86         | 13,63         | 15,31         |
| 9,33          | 14,69         | 13,45         | 13,33         | 12,74         | 14,14         | 15,11         |
| 14,96         | 12,65         | 13,47         | 16,15         | 13,6          | 15,25         | 14,56         |
| 13,4          | 14,03         | 14,11         | 12,33         | 12,39         | 12,11         | 13,5          |
| 14,71         | 14,04         | 14,08         | 13,18         | 11,63         | 15,47         | 13,74         |
| 13,54         | 14,65         | 14,92         | 13,9          | 14,32         | 11,27         | 14,22         |
| 14,35         | 14,07         | 12,75         | 15,42         | 14,8          | 8,96          | 13,04         |
| 14,21         | 10,42         | 13,52         | 7,84          | 12,36         | 11,98         | 14,45         |
| 15,43         | 13,37         | 15,93         | 14,52         | 8,25          | 14,55         | 13,16         |
| 13,29         | 13,89         | 13,96         | 14,47         | 13,12         | 13,94         | 14,37         |
| 16,02         | 14,68         | 14,3          | 15,22         | 12,28         | 12,92         | 14,47         |
| 13,89         | 13,82         | 14,41         | 13,33         | 14,62         | 14,89         | 12,83         |
| 14,12         | 12,33         | 14,3          | 14,52         | 14,32         | 13,61         | 12,04         |
| 13,77         | 13,68         | 13,06         | 14,14         | 14,14         | 14,44         | 14,46         |
| 14,13         | 14,56         | 11,86         | 14,91         | 12,13         | 13,96         | 13,85         |
| 13,96         | 14,85         | 15,55         | 12,47         | 12,36         | 14            | 14,19         |
| 15,03         | 14,67         | 11,85         | 14,68         | 13,54         | 12,16         | 14,5          |
| 14,91         | 13,23         | 14,19         | 12,7          | 14,82         | 16,17         | 13,66         |
| 13,88         | 12,67         | 14,03         | 12,87         | 12,65         | 5,38          | 10,6          |
| 15,51         | 13,46         | 15,76         | 15,08         | 12,78         | 13            | 13,84         |
| 12,91         | 14,43         | 13,16         | 14,53         | 16,28         | 11,77         | 13,75         |
| 14,87         | 13,58         | 15,19         | 14,75         | 15,5          | 12,62         | 13,03         |
| 16,15         | 13,76         | 15,62         | 12,68         | 13,93         | 11,99         | 13,09         |
| 14,03         | 15,31         | 12,11         | 14,51         | 12,36         | 13,43         | 12,53         |
| 6,81          | 15,84         | 13,57         | 13,73         | 12,79         | 11,61         | 14,72         |
| 14,73         | 14,06         | 17,29         | 13,02         | 13,99         | 11,6          | 12,92         |
| 11,97         | 12,72         | 15,04         | 12,68         | 14,28         | 14,88         | 14,22         |

|       |       |       |       |       |       |       |
|-------|-------|-------|-------|-------|-------|-------|
| 13,27 | 15,28 | 15,58 | 14,14 | 13,74 | 8,67  | 13,05 |
| 15,53 | 10,5  | 14,23 | 14,51 | 14,37 | 14,57 | 12,17 |
| 14,52 | 12,41 | 14,65 | 14,65 | 14,14 | 13,38 | 13,71 |
| 13,3  | 13,19 | 14,11 | 13,62 | 13,77 | 14,89 | 14,15 |
| 10,93 | 16,04 | 13,33 | 12,54 | 11,39 | 10,56 | 14,77 |
| 14,52 | 14,15 | 12,27 | 13,49 | 14,13 | 14,91 | 12,7  |
| 14,99 | 14,17 | 13,44 | 14,55 | 15,29 | 14,06 | 11,88 |
| 15,54 | 15,77 | 13,38 | 13,12 | 13,83 | 12,75 | 15,6  |
| 15,38 | 14,11 | 12,46 | 11,82 | 15,96 | 14,7  | 14,35 |
| 15,01 | 14,74 | 12,13 | 15,23 | 11,97 | 11,83 | 13,87 |
| 12,76 | 11,02 | 12,55 | 15,03 | 13,59 | 15,36 | 13,9  |
| 15,98 | 11,89 | 14,41 | 14,94 | 12,25 | 12,58 | 13,49 |
| 7,41  | 13,17 | 12,16 | 15,6  | 13,35 | 13,97 | 14,97 |
| 14,94 | 12,39 | 14,1  | 14,64 | 13,02 | 13,06 | 13,49 |
| 14,08 | 11,94 | 11,92 | 12,98 | 12,71 | 12,6  | 13,92 |
| 15,49 | 14,46 | 11,48 | 14,25 | 13,46 | 8,2   | 15,05 |
| 13,71 | 13,48 | 14,61 | 15,2  | 13,14 | 14,76 | 7,94  |
| 12,51 | 13,03 | 14,72 | 13,84 | 12,93 | 10,02 | 11,81 |
| 13,39 | 15,16 | 13,3  | 13,82 | 12,16 | 14,38 | 14,79 |
| 15,84 | 14,82 | 14,77 | 14,72 | 12,95 | 10,98 | 10,95 |
| 14,34 | 16,08 | 13,05 | 12,82 | 13,16 | 14,04 | 12,43 |
| 14,29 | 13,25 | 15,18 | 13,32 | 12,67 | 15,3  | 10,52 |
| 14,47 | 11,82 | 15,53 | 16    | 12,77 | 14,21 | 15,6  |
| 15,12 | 14,72 | 15,44 | 12,47 | 12,09 | 11,71 | 13,44 |
| 13,66 | 14,56 | 12,93 | 15,51 | 11,7  | 11,2  | 9,68  |
| 12,95 | 15,44 | 13,58 | 14,71 | 13,46 | 12,67 | 14,31 |
| 14,55 | 15,66 | 14,53 | 13,59 | 7,39  | 13,03 | 14,35 |
| 15,72 | 14,34 | 12,54 | 14,17 | 14,23 | 14,85 | 12,89 |
| 5,9   | 13,89 | 15,06 | 16,31 | 12,84 | 12,15 | 13,22 |
| 15,42 | 15,26 | 14,41 | 12,09 | 12,08 | 11,93 | 11,27 |
| 14,44 | 13,82 | 14,03 | 11,31 | 15,39 | 13,32 | 14,64 |
| 15,66 | 12,4  | 13,49 | 14,12 | 12,77 | 13,4  | 15,88 |
| 15,77 | 15,88 | 14,35 | 15,39 | 13,92 | 13,95 | 14,22 |
| 14,94 | 15,9  | 13,75 | 14,65 | 13    | 11,64 | 15,25 |
| 14,86 | 14,39 | 14,08 | 14,45 | 14,15 | 14,41 | 15,42 |
| 14,65 | 15,41 | 13,43 | 15,57 | 13,88 | 13,49 | 13,12 |
| 12,38 | 14,23 | 14,11 | 15,07 | 11,67 | 16,04 | 10,64 |
| 14,63 | 15,29 | 14,97 | 12,77 | 13,21 | 10,06 | 11,15 |
| 13,18 | 14,63 | 12,11 | 12,62 | 12,63 | 14,43 | 14,27 |
| 15,1  | 14,28 | 13,61 | 12,78 | 7,61  | 14,09 | 14,1  |

|    |    |    |    |    |    |    |
|----|----|----|----|----|----|----|
| 0  | 0  | 0  | 0  | 0  | 0  | 0  |
| 1  | 0  | 0  | 0  | 0  | 0  | 1  |
| 1  | 1  | 0  | 0  | 0  | 0  | 0  |
| 1  | 0  | 0  | 1  | 2  | 0  | 2  |
| 0  | 0  | 0  | 0  | 2  | 3  | 0  |
| 2  | 0  | 0  | 0  | 0  | 1  | 1  |
| 3  | 3  | 0  | 0  | 2  | 8  | 4  |
| 3  | 5  | 5  | 4  | 8  | 14 | 7  |
| 7  | 14 | 16 | 18 | 32 | 14 | 14 |
| 20 | 22 | 26 | 26 | 25 | 26 | 28 |
| 37 | 34 | 38 | 29 | 21 | 25 | 30 |
| 21 | 19 | 12 | 17 | 7  | 5  | 14 |
| 4  | 2  | 2  | 5  | 1  | 3  | 0  |
| 0  | 0  | 1  | 0  | 0  | 0  | 0  |



| <b>418 cm</b> | <b>423 cm</b> | <b>428 cm</b> | <b>433 cm</b> | <b>438 cm</b> | <b>443 cm</b> | <b>448 cm</b> |
|---------------|---------------|---------------|---------------|---------------|---------------|---------------|
| 10,84         | 15,41         | 13,9          | 13,49         | 14,56         | 12,49         | 15,14         |
| 15,1          | 14,12         | 15,03         | 14,19         | 12,37         | 13,85         | 10,91         |
| 14,83         | 11,8          | 13,35         | 12,54         | 11,49         | 10,4          | 12,41         |
| 14,8          | 11,44         | 15,09         | 14,4          | 15,8          | 14,93         | 14            |
| 12,38         | 13,06         | 14,61         | 15,33         | 14,31         | 12,41         | 14,19         |
| 14,17         | 11,6          | 11,55         | 12,17         | 14,91         | 11,71         | 14,73         |
| 14,06         | 13,58         | 13,67         | 14,03         | 12,66         | 10,15         | 12,4          |
| 14,15         | 12,55         | 13,78         | 13,98         | 12,8          | 12,9          | 13,35         |
| 11,77         | 13,52         | 14,22         | 13,14         | 13,73         | 15,49         | 14,27         |
| 12,46         | 15,19         | 11,95         | 13,61         | 9,04          | 14,23         | 15,75         |
| 14,1          | 12,76         | 14,56         | 13,19         | 15,81         | 14,06         | 14,72         |
| 15,16         | 7,74          | 13,87         | 15,95         | 15,1          | 11,95         | 14,11         |
| 14,03         | 13,68         | 13,03         | 15,68         | 13,4          | 13,78         | 13,4          |
| 14,6          | 13,2          | 14,54         | 14,4          | 13,87         | 14,99         | 14,76         |
| 12,78         | 13,58         | 12,77         | 8,59          | 12,87         | 13,58         | 14,42         |
| 14,35         | 13,76         | 10,4          | 12,74         | 12,91         | 13,36         | 12,02         |
| 12,94         | 13,17         | 13,46         | 13,98         | 14,58         | 12,76         | 14,86         |
| 14,48         | 8,81          | 13,78         | 8,59          | 11,7          | 13,59         | 12,03         |
| 14,72         | 15,79         | 11,47         | 12,89         | 14,91         | 11,82         | 13,88         |
| 12,94         | 15,29         | 15,47         | 14,91         | 15,02         | 13,49         | 12,78         |
| 14,31         | 14,89         | 13,73         | 13,83         | 15,06         | 13,61         | 13,19         |
| 14,96         | 14,13         | 13,88         | 13,73         | 14,55         | 14,53         | 12,93         |
| 14,53         | 14,29         | 14,57         | 13,84         | 15,18         | 12,28         | 13,67         |
| 14,19         | 14,58         | 13,59         | 11,12         | 13,94         | 12,35         | 12,53         |
| 14,4          | 14,07         | 15,23         | 14,39         | 15            | 13,96         | 14,11         |
| 13,97         | 12,51         | 14,78         | 13,4          | 11,94         | 13,67         | 14,04         |
| 15,06         | 14,72         | 13,55         | 14,16         | 14,58         | 13,7          | 14,74         |
| 14,53         | 14,85         | 10,93         | 14,06         | 13,26         | 11,97         | 12,9          |
| 13,05         | 13,08         | 11,39         | 12,99         | 14,94         | 12,09         | 14,75         |
| 12,89         | 14,21         | 12,35         | 15,41         | 14,49         | 14,93         | 14,36         |
| 15,26         | 14,46         | 11,56         | 14,21         | 14,73         | 13,21         | 13,22         |
| 12,65         | 12,86         | 13,2          | 14,65         | 12,56         | 11,44         | 13,75         |
| 13,38         | 14,56         | 8,64          | 12,89         | 11,74         | 14,27         | 14,08         |
| 13,56         | 15,39         | 15,46         | 9,73          | 13,94         | 12,91         | 14,42         |
| 12,74         | 13,13         | 15,16         | 12,11         | 15,36         | 15,21         | 14,48         |
| 13,51         | 12,59         | 14,34         | 14,46         | 14,93         | 12,18         | 14,75         |
| 15,97         | 14,03         | 15,15         | 15,65         | 16,19         | 13,06         | 15,2          |
| 13,48         | 15,58         | 12,97         | 14,84         | 12,66         | 8,98          | 11,61         |
| 14,75         | 11,35         | 14,49         | 13,82         | 12,08         | 12,41         | 15,84         |
| 13,7          | 12,16         | 13,17         | 12,79         | 12,39         | 14,89         | 15            |
| 13,48         | 14,25         | 14,63         | 15,18         | 15,54         | 15,31         | 13,04         |
| 13,8          | 15,75         | 13,35         | 11,62         | 14,53         | 15,65         | 14,24         |
| 14,36         | 14,73         | 12,9          | 14,5          | 14,42         | 15,1          | 13,12         |
| 14,66         | 14,04         | 13,35         | 10,29         | 12,63         | 14,31         | 12,93         |
| 9,88          | 12,98         | 14,71         | 12,9          | 13,54         | 13,42         | 12,64         |
| 14,1          | 14,08         | 15,12         | 13,94         | 13,88         | 14,44         | 13,06         |
| 12,66         | 12,57         | 13,84         | 7,08          | 13,52         | 14,72         | 15,27         |
| 14,83         | 13,59         | 12,93         | 13,8          | 14,45         | 14,69         | 13,88         |
| 11,52         | 14,47         | 13,46         | 14,53         | 15,19         | 13,46         | 12,72         |
| 13,56         | 12,3          | 14,78         | 12,87         | 13,99         | 15,65         | 14,87         |
| 13,5          | 15,74         | 14,19         | 13,81         | 14,21         | 13,02         | 13,02         |
| 11,83         | 15,38         | 13,88         | 15,21         | 14,4          | 14,99         | 14,35         |
| 14,75         | 10,05         | 12,74         | 15,92         | 14,47         | 12,66         | 13,49         |
| 13,74         | 10,36         | 13,54         | 16,29         | 11,08         | 10,34         | 15,03         |
| 13,64         | 13,62         | 13,7          | 13,71         | 14,23         | 12,07         | 13,88         |
| 11,89         | 15,19         | 14,34         | 15,57         | 14,39         | 12,06         | 12,64         |
| 15,37         | 13,6          | 12,76         | 13,97         | 13,28         | 15,19         | 12,53         |
| 14,74         | 14,44         | 14,19         | 6,98          | 10,97         | 15,27         | 13,99         |
| 13,16         | 12,26         | 11,88         | 14,07         | 14,56         | 14,14         | 13,87         |
| 14,98         | 14,67         | 13,62         | 12,29         | 12            | 12,87         | 13,41         |

|       |       |       |       |       |       |       |
|-------|-------|-------|-------|-------|-------|-------|
| 13,44 | 13,3  | 12,32 | 13,42 | 12,81 | 12,02 | 13,61 |
| 14,9  | 14,2  | 13,07 | 12,28 | 13,59 | 13,87 | 14,41 |
| 12,95 | 15,33 | 12,23 | 13,38 | 13,17 | 13,17 | 13    |
| 15,37 | 13,47 | 14,21 | 13,37 | 15,1  | 15,47 | 15,63 |
| 13,02 | 12,36 | 12,7  | 12,8  | 11,67 | 14,14 | 8,84  |
| 15,58 | 14,79 | 13,58 | 13,16 | 13,89 | 15,1  | 12,91 |
| 12,85 | 14,42 | 13,56 | 11,97 | 12,92 | 14,14 | 13,56 |
| 12,61 | 12,47 | 14,67 | 13,42 | 14,47 | 12,16 | 13,37 |
| 14,75 | 12,06 | 14,08 | 13,02 | 15,45 | 12,54 | 14,95 |
| 13,08 | 13,48 | 12,75 | 14,89 | 11,82 | 15,61 | 11,37 |
| 14,83 | 13,08 | 13,61 | 5,45  | 13,4  | 13,38 | 14,86 |
| 14,04 | 14,32 | 14,66 | 8,64  | 14    | 13,85 | 11,86 |
| 14,81 | 14,04 | 13,53 | 15,54 | 12,7  | 13,82 | 13,02 |
| 15,48 | 13,1  | 15    | 14,01 | 15,03 | 13,09 | 13,38 |
| 14,16 | 12,33 | 15,19 | 11,54 | 12,63 | 9,8   | 14,53 |
| 15,04 | 13,42 | 13,44 | 14,26 | 15,59 | 14,41 | 13,21 |
| 14,67 | 13,01 | 13,87 | 12,51 | 14,25 | 11,19 | 14,16 |
| 13,96 | 12,85 | 14,04 | 12,89 | 12,47 | 13,83 | 12,5  |
| 14,52 | 14,77 | 12,24 | 10,67 | 12,59 | 11,89 | 13,43 |
| 10,89 | 14,61 | 13,87 | 13,16 | 12,74 | 12,33 | 13,88 |
| 13,53 | 12,28 | 15,49 | 13,96 | 14,84 | 14,24 | 10,99 |
| 14,22 | 8,54  | 14,36 | 13,47 | 13,2  | 14,38 | 8,39  |
| 13,21 | 13,9  | 13,4  | 15,08 | 14,96 | 16,83 | 9,63  |
| 14,65 | 13,77 | 13,55 | 14,01 | 14,76 | 14,55 | 14,29 |
| 10,53 | 14,29 | 13,74 | 10,71 | 13,78 | 15,22 | 12,27 |
| 13,32 | 15,11 | 15,28 | 14,01 | 13,68 | 12,78 | 12    |
| 13,61 | 12,78 | 13,66 | 14,91 | 14,36 | 13,21 | 13,17 |
| 13,18 | 12,9  | 14,4  | 11,08 | 11,91 | 13,64 | 14,65 |
| 15,13 | 14,67 | 15,21 | 13,54 | 14    | 12,93 | 12,27 |
| 15,23 | 11,85 | 11,95 | 15,19 | 10,74 | 14,01 | 15,72 |
| 13,66 | 13,34 | 13,75 | 15,22 | 13,93 | 14,19 | 12,83 |
| 13,96 | 13,48 | 12,66 | 14,49 | 14,54 | 14,09 | 14,89 |
| 13,79 | 13,91 | 14,63 | 11,91 | 14,95 | 13,12 | 13,46 |
| 13,91 | 15,08 | 14,19 | 14,28 | 14,07 | 14,4  | 12,9  |
| 13,05 | 14,06 | 12,46 | 9,38  | 13,53 | 16,56 | 14,79 |
| 13,94 | 14,55 | 13,3  | 13,17 | 12,16 | 14,96 | 14,83 |
| 13,59 | 13,72 | 14,21 | 14,91 | 11,79 | 14,5  | 12,21 |
| 14,77 | 15,19 | 12,22 | 13,12 | 13,12 | 12,14 | 14,73 |
| 13,48 | 12,8  | 12,75 | 12,95 | 13,4  | 14,28 | 12,46 |
| 15,77 | 14,49 | 14,96 | 15,5  | 14,14 | 14,68 | 13,1  |

|    |    |    |    |    |    |    |
|----|----|----|----|----|----|----|
| 0  | 0  | 0  | 0  | 0  | 0  | 0  |
| 0  | 0  | 0  | 1  | 0  | 0  | 0  |
| 0  | 0  | 0  | 1  | 0  | 0  | 0  |
| 0  | 1  | 0  | 1  | 0  | 0  | 0  |
| 0  | 2  | 1  | 3  | 0  | 1  | 2  |
| 1  | 0  | 0  | 2  | 1  | 1  | 1  |
| 3  | 2  | 2  | 3  | 2  | 3  | 2  |
| 4  | 5  | 7  | 6  | 9  | 7  | 3  |
| 12 | 19 | 16 | 16 | 19 | 21 | 22 |
| 31 | 26 | 36 | 28 | 22 | 25 | 29 |
| 36 | 31 | 25 | 24 | 32 | 28 | 32 |
| 13 | 14 | 13 | 14 | 14 | 12 | 9  |
| 0  | 0  | 0  | 1  | 1  | 2  | 0  |
| 0  | 0  | 0  | 0  | 0  | 0  | 0  |

| <b>453 cm</b> | <b>458 cm</b> | <b>463 cm</b> | <b>468 cm</b> | <b>473 cm</b> | <b>478 cm</b> | <b>483 cm</b> |
|---------------|---------------|---------------|---------------|---------------|---------------|---------------|
| 15,29         | 15,62         | 11,97         | 13,96         | 13,35         | 12,93         | 12,33         |
| 13,08         | 13,55         | 13,73         | 13,48         | 13,4          | 14,62         | 10,06         |
| 12,94         | 13,4          | 15,03         | 13,88         | 13,25         | 14,87         | 14,88         |
| 13,09         | 14,4          | 13,49         | 15,49         | 13,84         | 14,51         | 14,62         |
| 14,15         | 14,51         | 14,08         | 14,44         | 14,49         | 12,84         | 13,64         |
| 12,68         | 14,91         | 14,32         | 14,29         | 11,98         | 15,99         | 15,86         |
| 13,36         | 12,7          | 13,41         | 14,06         | 15,17         | 13,29         | 15,31         |
| 14,64         | 14,34         | 13,28         | 13,78         | 16,3          | 14,66         | 14,25         |
| 13,23         | 13,97         | 13,35         | 13,32         | 12,27         | 15,21         | 13,34         |
| 12,51         | 12,76         | 14,82         | 14,23         | 13,1          | 13,6          | 13,95         |
| 13,14         | 14,57         | 13,43         | 11,89         | 13,9          | 15,93         | 13            |
| 13,68         | 8,6           | 15,45         | 11,57         | 14,24         | 15,28         | 12,77         |
| 13,8          | 14,42         | 13,1          | 13,44         | 14,46         | 13,01         | 13,14         |
| 14,83         | 14,15         | 13,23         | 12,99         | 12,1          | 14,56         | 12,5          |
| 13,66         | 13,21         | 12,62         | 12,53         | 12,64         | 13,99         | 14,66         |
| 11,59         | 12,83         | 14,76         | 10,29         | 14,93         | 14,13         | 15,06         |
| 12,64         | 14,58         | 13,45         | 15,14         | 15,4          | 15,03         | 12,06         |
| 14,34         | 14,85         | 14,64         | 13,13         | 13,32         | 14,93         | 12,29         |
| 14,06         | 13,11         | 13,82         | 11,38         | 12,46         | 13,95         | 15,06         |
| 12,29         | 14,62         | 14,29         | 15,42         | 11,44         | 14,03         | 12,38         |
| 14,6          | 7,55          | 9,19          | 13,81         | 11,75         | 13,56         | 15,74         |
| 10,96         | 15,12         | 12,64         | 12,08         | 13,59         | 13,97         | 12,39         |
| 14,4          | 14,65         | 12,67         | 15,13         | 11,65         | 14,87         | 13,92         |
| 14,78         | 14,73         | 10,87         | 15,05         | 14,68         | 13,63         | 11,82         |
| 12,87         | 13,45         | 14,91         | 14,99         | 13,94         | 12,04         | 14,5          |
| 12,26         | 13,87         | 14,86         | 15,82         | 12,38         | 15,12         | 14,37         |
| 13,68         | 12,03         | 13,6          | 14,4          | 13,33         | 11,97         | 14,21         |
| 12,11         | 14,39         | 14,09         | 14,08         | 12,38         | 14,55         | 12,11         |
| 13,13         | 13,53         | 14,77         | 14,73         | 13,95         | 12,49         | 14,3          |
| 11,81         | 13,4          | 14,78         | 15,27         | 11,9          | 13,55         | 12,61         |
| 16,71         | 15,23         | 11,4          | 12,67         | 15,38         | 15,4          | 14,08         |
| 15,11         | 12,01         | 8,32          | 14,16         | 13,91         | 14,23         | 14,63         |
| 13,96         | 15,43         | 14,86         | 13,23         | 14,94         | 15,73         | 14,16         |
| 14,78         | 13,88         | 12,29         | 14,72         | 15,2          | 12,66         | 15,16         |
| 11,6          | 15,27         | 14,58         | 15,34         | 12,51         | 15,15         | 15,23         |
| 11,52         | 14,42         | 14,07         | 14,75         | 12,91         | 13,9          | 15,01         |
| 12,07         | 12,98         | 13,29         | 13,79         | 13,64         | 13,29         | 15,07         |
| 13,47         | 13,84         | 13,23         | 15,94         | 12,33         | 14,13         | 14,75         |
| 13,41         | 12,83         | 13,78         | 13,92         | 12,49         | 13,95         | 14,69         |
| 13,61         | 15,74         | 13,67         | 14,02         | 15,76         | 11,63         | 13,82         |
| 12,9          | 14,34         | 14,21         | 12,45         | 12,5          | 13,07         | 15,13         |
| 13,04         | 14,01         | 15,02         | 11,11         | 15,57         | 12,79         | 13,16         |
| 12,6          | 13,51         | 13,9          | 13,26         | 12,23         | 14,92         | 14,85         |
| 13,5          | 15,08         | 14,21         | 11,16         | 14,72         | 13,22         | 13,79         |
| 13,92         | 13,6          | 14,12         | 12,27         | 13,16         | 13,93         | 14,34         |
| 13,77         | 14,92         | 13,15         | 13,9          | 13,17         | 15,53         | 12,7          |
| 12,68         | 10,48         | 14,76         | 13,06         | 12,15         | 13,61         | 14,53         |
| 12,91         | 14,63         | 14,89         | 14,15         | 13,51         | 14,77         | 14,06         |
| 13,4          | 14,74         | 15,35         | 13,44         | 13,9          | 13,32         | 11,52         |
| 14,77         | 15,44         | 14,92         | 13,32         | 13,7          | 13,55         | 14,36         |
| 14,95         | 13,09         | 15,55         | 14,62         | 13,34         | 15,41         | 14,51         |
| 12,44         | 14,58         | 11,14         | 13,82         | 12,86         | 12,53         | 11,69         |
| 15,77         | 11,72         | 14,62         | 14,3          | 13,37         | 14,53         | 13,61         |
| 11,04         | 14,13         | 14,6          | 14,89         | 12,9          | 15,75         | 14,52         |
| 13,8          | 14,46         | 15,86         | 13,43         | 15,02         | 13,9          | 11,84         |
| 12,61         | 13,49         | 13,82         | 13,68         | 14,35         | 12,7          | 12,87         |
| 11,14         | 13,49         | 13,69         | 15,39         | 12,86         | 14,62         | 12,91         |
| 11,6          | 14,96         | 14,42         | 13,26         | 15,03         | 12,47         | 16,27         |
| 9,23          | 15,09         | 12,53         | 13,77         | 14,22         | 13,36         | 13            |
| 15,17         | 11,4          | 13,84         | 15,08         | 12,28         | 14,69         | 14,94         |

|       |       |       |       |       |       |       |
|-------|-------|-------|-------|-------|-------|-------|
| 12,23 | 12,98 | 12,89 | 15,06 | 14,42 | 12,55 | 13,32 |
| 13,22 | 15,7  | 12,87 | 15,01 | 14,42 | 13,78 | 13,06 |
| 13,53 | 9,44  | 14,82 | 13,42 | 11,91 | 13,16 | 14,25 |
| 13,52 | 10,11 | 14,14 | 14,98 | 15,68 | 12,66 | 14,08 |
| 15,97 | 6,67  | 12,17 | 13,76 | 13,28 | 11,82 | 14,31 |
| 13,81 | 13,96 | 14,04 | 13,87 | 13,47 | 15,32 | 11,56 |
| 11,23 | 13,05 | 13,96 | 13,92 | 13,73 | 13,71 | 14,53 |
| 13,51 | 15,28 | 14,08 | 11,61 | 11,28 | 13,13 | 14,1  |
| 9,39  | 14,37 | 14,6  | 15,04 | 12,78 | 14,65 | 13,02 |
| 14,01 | 13,59 | 12,81 | 12,01 | 12,83 | 13,21 | 13,23 |
| 13,8  | 13,63 | 15,21 | 10,38 | 13,38 | 14,27 | 8,06  |
| 15,31 | 14,44 | 13,06 | 15,5  | 13,34 | 15,69 | 13,95 |
| 12,58 | 14,56 | 15,42 | 13,26 | 13,87 | 14,78 |       |
| 13,36 | 13,99 | 15,73 | 14,6  | 13,21 | 12,76 |       |
| 15,08 | 14,62 | 13,56 | 13,98 | 13,59 | 13,55 |       |
| 15,31 | 14,22 | 14,08 | 16,43 | 11,9  | 14,53 |       |
| 11,49 | 13,4  | 14,19 | 14,93 | 13,28 | 14,53 |       |
| 10,84 | 15,29 | 16    | 11,01 | 14,17 | 14,83 |       |
| 15,76 | 8,46  | 13,38 | 15,37 | 13,55 | 14,37 |       |
| 13,48 | 11,4  | 9,86  | 12,43 | 14,3  | 14,55 |       |
| 12,69 | 13,46 | 14,53 | 12,91 | 15,19 | 15,19 |       |
| 14,38 | 12,85 | 13,91 | 15,1  | 12,96 | 15,27 |       |
| 13,49 | 14,25 | 8,03  | 12,85 | 14,1  | 12,51 |       |
| 15,08 | 13,64 | 15,89 | 14,68 | 13,61 | 13,56 |       |
| 15,87 | 13,94 | 12,06 | 13,62 | 14,69 | 14,53 |       |
| 14,21 | 14,85 | 15,59 | 13,59 | 15,56 | 14,41 |       |
| 11,7  | 13,01 | 13,46 | 15,14 | 14,49 | 15,41 |       |
| 15,19 | 13,07 | 14,15 | 13,78 | 13,19 | 14,02 |       |
| 12,23 | 12,09 | 14,05 | 8,78  | 15,09 | 14,38 |       |
| 13,84 | 13,4  | 16,1  | 14,6  | 12,7  | 14,41 |       |
| 13,34 | 15,28 | 14,18 | 15,86 | 13,08 | 14,27 |       |
| 12,24 | 13,84 | 13,37 | 16,14 | 15,32 | 14,1  |       |
| 13,43 | 15,16 | 14,38 | 15,23 | 7,71  | 14,37 |       |
| 14,36 | 9,29  | 10,76 | 14,29 | 16,21 | 13,19 |       |
| 14,51 | 12,65 | 13,96 | 14,55 | 14,1  | 13,55 |       |
| 14,18 | 11,84 | 14,28 | 14,23 | 13,3  | 15,39 |       |
| 12,98 | 11,54 | 13,53 | 12,53 | 14,91 | 14,74 |       |
| 15,58 | 12,76 | 13,77 | 14,86 | 11,6  | 13,55 |       |
| 13,59 | 11,99 | 14,11 | 14,24 | 14,19 | 13,03 |       |
| 14,06 | 12,55 | 16,12 | 13,67 | 14,89 | 14,73 |       |

|    |    |    |    |    |    |    |
|----|----|----|----|----|----|----|
| 0  | 0  | 0  | 0  | 0  | 0  | 0  |
| 0  | 0  | 0  | 0  | 0  | 0  | 0  |
| 0  | 1  | 0  | 0  | 0  | 0  | 0  |
| 0  | 1  | 0  | 0  | 1  | 0  | 0  |
| 0  | 2  | 2  | 1  | 0  | 0  | 1  |
| 2  | 2  | 2  | 0  | 0  | 0  | 0  |
| 2  | 2  | 2  | 2  | 0  | 0  | 1  |
| 10 | 6  | 3  | 7  | 9  | 3  | 5  |
| 21 | 13 | 10 | 11 | 21 | 13 | 12 |
| 33 | 29 | 30 | 31 | 34 | 31 | 16 |
| 18 | 30 | 37 | 26 | 20 | 35 | 26 |
| 13 | 14 | 11 | 20 | 13 | 18 | 10 |
| 1  | 0  | 3  | 2  | 2  | 0  | 1  |
| 0  | 0  | 0  | 0  | 0  | 0  | 0  |

| <b>488 cm</b> | <b>493 cm</b> | <b>498 cm</b> | <b>503 cm</b> | <b>508 cm</b> | <b>513 cm</b> | <b>518 cm</b> |
|---------------|---------------|---------------|---------------|---------------|---------------|---------------|
| 13,08         | 12,88         | 12,71         | 14,51         | 12,79         | 15,49         | 12,49         |
| 10,85         | 13,62         | 14,06         | 15,31         | 12,98         | 12,8          | 15,47         |
| 13,82         | 15,02         | 11,35         | 11,04         | 13,97         | 8,27          | 9,72          |
| 13,22         | 13,49         | 8,49          | 13,72         | 12,87         | 7,62          | 14,81         |
| 13,18         | 13,13         | 11,19         | 12,04         | 13,61         | 7,52          | 12,48         |
| 11,91         | 16,63         | 14,67         | 13,79         | 12,35         | 10,47         | 12,59         |
| 15,64         | 14,72         | 14,34         | 15,02         | 12,18         | 6,99          | 13,53         |
| 11,31         | 13,82         | 9,61          | 15,65         | 12,21         | 7,51          | 14,27         |
| 16,08         | 13,26         | 13,82         | 14,93         | 12,77         | 14,33         | 13,51         |
| 15,25         | 13,46         | 12,48         | 15,37         | 10,89         | 15,26         | 16,15         |
| 13,71         | 12,58         | 13,74         | 13,58         | 10,86         | 14,87         | 13,36         |
| 15,95         | 13,21         | 14,25         | 13,3          | 14,34         | 8,35          | 15,28         |
| 13,84         | 12,51         | 12,2          | 14,6          | 13,84         | 14,16         | 14,3          |
| 13,23         | 11,94         | 15,66         | 12,04         | 14,1          | 11,59         | 12,01         |
| 15,15         | 12,93         | 12,38         | 14,05         | 14,81         | 6,89          | 15,23         |
| 12,01         | 14,95         | 13,59         | 13,03         | 14,37         | 7,73          | 14,56         |
| 12,93         | 12,39         | 13,26         | 15,21         | 13,28         | 13,35         | 15,8          |
| 14,5          | 14,81         | 12,69         | 13,29         | 14,31         | 11,13         | 12,3          |
| 6,81          | 13,76         | 13,49         | 13,67         | 13,68         | 11,58         | 13,4          |
| 10,69         | 14,33         | 8,7           | 12,67         | 9,8           | 7,05          | 12,69         |
| 12,96         | 11,15         | 10,33         | 14,34         | 10,19         | 15,33         | 13,01         |
| 14,34         | 11,72         | 13,25         | 15,63         | 15,42         | 6,52          | 14,12         |
| 9,58          | 14,96         | 5,98          | 16,29         | 11,35         | 7,06          | 13,87         |
| 14,8          | 14,15         | 16,23         | 13,63         | 14,25         | 10,03         | 13,5          |
| 11,86         | 13,58         | 12,33         | 16,84         | 14,77         | 13,34         | 12,36         |
| 14            | 14,25         | 13,59         | 7,41          | 15,28         | 8,96          | 15,38         |
| 14,76         | 15,54         | 12,8          | 13,9          | 9,98          | 7,83          | 14,81         |
| 14,4          | 15,56         | 13,75         | 15,06         | 13,37         | 10,97         | 13,76         |
| 11,14         | 15,54         | 14,55         | 13,71         | 12,83         | 8,86          | 16,33         |
| 8,58          | 11,28         | 14,35         | 15,12         | 12,64         | 7,31          | 14,36         |
| 15,61         | 12,36         | 14,19         | 13,85         | 14,68         | 7,74          | 13,86         |
| 11,57         | 13,64         | 14,35         | 14,77         | 13,79         | 8,54          | 13,68         |
| 16,23         | 14,38         | 15,28         | 12,06         | 13,76         | 13,72         | 15,36         |
| 14,03         | 15,75         | 12,72         | 14,59         | 14,41         | 6,96          | 14,53         |
| 12,6          | 14,06         | 14,84         | 15,02         | 12,77         | 10,01         | 12,41         |
| 8,36          | 14,06         | 12,13         | 13,6          | 12,23         | 9,06          | 15,13         |
| 15,27         | 11,21         | 14,11         | 15,68         | 14,65         | 16,03         | 15,13         |
| 13,01         | 14,69         | 14,48         | 14,34         | 12,64         | 11,91         | 13,84         |
| 12,75         | 14,46         | 14,97         | 15,47         | 11,91         | 13,05         | 14,66         |
| 13,09         | 15,55         | 13,18         | 15,39         | 10,5          | 12,65         | 15,75         |
| 13,78         | 15,77         | 14,51         | 12,68         | 14,59         | 15,19         | 15,32         |
| 14,14         | 14,92         | 11,49         | 15,21         | 13,83         | 13,28         | 15,85         |
| 10,34         | 13,09         | 13,66         | 12,48         | 10,48         | 10,29         | 16,14         |
| 12,44         | 12,2          | 15,82         | 12,41         | 12,39         | 13,78         | 13,22         |
| 15,89         | 15,02         | 14,1          | 12,59         | 14,15         | 14,1          | 15,95         |
| 13,04         | 15,92         | 15,63         | 13,38         | 15,11         | 12,49         | 13,45         |
| 11,88         | 12,9          | 12,45         | 13,78         | 14,17         | 14,31         | 15,23         |
| 13,5          | 12,06         | 11,67         | 14,31         | 15,04         | 15,32         | 11,1          |
| 16,15         | 12,72         | 15,44         | 13,37         | 12,53         | 14,85         | 11,98         |
| 13,7          | 13,21         | 13,97         | 13,68         | 13,93         | 13,12         | 12,8          |
| 13,19         | 12,78         | 14,96         | 7,59          | 14,21         | 15,15         | 15,25         |
| 12,58         | 14,63         | 15,62         | 14,05         | 13,38         | 14,37         | 14,57         |
| 14,35         | 14,47         | 14,77         | 16,1          | 11,95         | 9,17          | 12,79         |
| 12,32         | 13,01         | 13,84         | 13,5          | 14,34         | 8,44          | 11,82         |
| 16,04         | 13,49         | 13,59         | 7,36          | 12,4          | 14,16         | 13,98         |
| 12,05         | 12,44         | 14,59         | 8,79          | 10,52         | 15,16         | 12,49         |
| 15,49         | 11,08         | 12,62         | 12,23         | 15            | 14,76         | 14,56         |
| 15,2          | 16,28         | 13,79         | 14,56         | 14,28         | 11,83         | 13,73         |
| 13,42         | 14,58         | 15,83         | 15,49         | 11,11         | 8,19          | 14,48         |
| 12,7          | 15,43         | 12,64         | 15,72         | 12,51         | 16,14         | 13,47         |

|       |       |       |       |       |       |       |
|-------|-------|-------|-------|-------|-------|-------|
| 11,43 | 14,65 | 14,49 | 12,35 | 8,48  | 15,72 | 16,54 |
| 12,76 | 14,19 | 15,65 | 14,14 | 14,49 | 14,12 | 13,02 |
| 13,87 | 12,79 | 14,98 | 15,7  | 13,38 | 7,27  | 13,45 |
| 14,5  | 15,7  | 12,24 | 15,84 | 13,85 | 13,9  | 14,28 |
| 12,28 | 13,59 | 13,17 | 14,08 | 12,2  | 8,09  | 14,92 |
| 14,63 | 14,68 | 13,61 | 14,07 | 12,22 | 14,46 | 13,79 |
| 13,23 | 13,01 | 7,74  | 12,7  | 13,29 | 11,68 | 15,35 |
| 14,43 | 12,99 | 14,54 | 14,71 | 15,53 | 7,37  | 12,27 |
| 13,53 | 13,3  | 15,78 | 12,03 | 8,87  | 7,12  | 13,98 |
| 12,29 | 13,01 | 16,42 | 12,36 | 9,81  | 12,86 | 13,69 |
| 13,99 | 14,24 | 13,37 | 15,25 | 13,74 | 14,62 | 12,69 |
| 11,88 | 14,42 | 13,1  | 15,21 | 14,98 | 13,01 | 13,83 |
| 14,09 | 15,12 | 13,25 | 15,65 | 14,12 | 8,15  | 13,13 |
| 9,28  | 13,89 | 14,21 | 13,49 | 15,4  | 13,64 | 13,85 |
| 12,62 | 15,54 | 15,18 | 14,55 | 15,18 | 7,85  | 14,47 |
| 12,44 | 16,12 | 14,81 | 14,55 | 14,36 | 8,66  | 14,76 |
| 16,1  | 12,53 | 14,74 | 14,41 | 14,37 | 8,09  | 15,53 |
| 14,94 | 11,54 | 13,82 | 14,07 | 15,15 | 13,62 | 12,74 |
| 12,66 | 14,84 | 14,24 | 13,51 | 14,68 | 7,48  | 14,26 |
| 15,62 | 14,86 | 14,65 | 15,08 | 12,65 | 12,96 | 13,57 |
| 15,21 | 14,47 | 13,18 | 13,68 | 13,81 | 12,3  | 13,79 |
| 13,1  | 16,6  | 15,56 | 13,51 | 13,56 | 9,71  | 11,16 |
| 14,48 | 14,02 | 15,47 | 13,58 | 13,95 | 14,81 | 14,36 |
| 13,81 | 14,25 | 12,9  | 13,64 | 13,14 | 9,42  | 13,56 |
| 15,28 | 13,93 | 15,87 | 13,57 | 13,93 | 9,02  | 12,32 |
| 13,46 | 12,86 | 13,51 | 14,21 | 12,32 | 7,26  | 14,91 |
| 8,63  | 12,08 | 14,95 | 13,89 | 9,37  | 10,96 | 11,85 |
| 12,51 | 11,77 | 12,23 | 12,19 | 12,63 | 12,3  | 14,4  |
| 14,39 | 12,9  | 13,85 | 14,38 | 13,31 | 12,28 | 13,38 |
| 12,86 | 13,19 | 14,84 | 15,59 | 13,28 | 15,68 | 13,65 |
| 15,39 | 14,72 | 15,03 | 13,6  | 14,95 | 14,37 | 14,32 |
| 13,19 | 13,28 | 11,99 | 14,15 | 13,57 | 15,02 | 13,59 |
| 13,53 | 15,68 | 14,38 | 13,5  | 13,29 | 9,82  | 13,56 |
| 14,32 | 11,83 | 13,67 | 15,78 | 13,58 | 8,19  | 13,55 |
| 8,19  | 11,22 | 14,32 | 14,36 | 13,98 | 14,3  | 13,34 |
| 11,79 | 14,27 | 10,72 | 15,68 | 13,46 | 8,19  | 12,66 |
| 13,75 | 14,6  | 14,05 | 13,55 | 12,65 | 12,35 | 12,87 |
| 15,15 | 12,19 | 11,04 | 12,58 | 15,19 | 12,21 | 13,23 |
| 11,63 | 13,46 | 12,73 | 12,79 | 13,42 | 14,64 | 13,9  |
| 11,56 | 10,04 | 14,45 | 12,75 | 9,44  | 12,19 | 8,15  |

|    |    |    |    |    |    |    |
|----|----|----|----|----|----|----|
| 0  | 0  | 0  | 0  | 0  | 0  | 0  |
| 0  | 0  | 1  | 0  | 0  | 0  | 0  |
| 1  | 0  | 0  | 0  | 0  | 4  | 0  |
| 0  | 0  | 1  | 3  | 0  | 15 | 0  |
| 4  | 0  | 2  | 1  | 2  | 13 | 1  |
| 2  | 0  | 1  | 0  | 5  | 6  | 1  |
| 3  | 1  | 2  | 0  | 6  | 6  | 0  |
| 11 | 10 | 6  | 1  | 4  | 6  | 5  |
| 18 | 19 | 16 | 17 | 22 | 11 | 17 |
| 25 | 23 | 24 | 28 | 28 | 11 | 35 |
| 17 | 29 | 31 | 23 | 23 | 16 | 21 |
| 14 | 14 | 14 | 24 | 10 | 10 | 16 |
| 5  | 4  | 2  | 3  | 0  | 2  | 4  |
| 0  | 0  | 0  | 0  | 0  | 0  | 0  |

| <b>523 cm</b> | <b>528 cm</b> | <b>533 cm</b> | <b>538 cm</b> | <b>543 cm</b> | <b>548 cm</b> | <b>553 cm</b> |
|---------------|---------------|---------------|---------------|---------------|---------------|---------------|
| 14,64         | 15,5          | 13,7          | 14,08         | 13,13         | 11,22         | 13,55         |
| 13,62         | 13,81         | 13,75         | 14,4          | 15,48         | 16,07         | 12,99         |
| 12,36         | 15,18         | 13,11         | 13,32         | 12,5          | 13,32         | 11,88         |
| 12,95         | 13,53         | 13,09         | 15,08         | 13,98         | 13,92         | 13,78         |
| 13,75         | 13,01         | 13,82         | 13,85         | 11,59         | 13,97         | 13,58         |
| 11,28         | 12,78         | 13,58         | 14,15         | 11,58         | 12,71         | 15,15         |
| 12,83         | 14,49         | 12,46         | 15,01         | 13,66         | 13,46         | 12,92         |
| 13,01         | 14,6          | 12,56         | 13,36         | 7,61          | 13,72         | 13,05         |
| 14,83         | 13,66         | 15,7          | 12,18         | 12,45         | 9,35          | 14,4          |
| 15,35         | 15,56         | 12,87         | 14,36         | 13,01         | 11,55         | 14,41         |
| 13,98         | 15,19         | 12,17         | 13,55         | 15,16         | 14,47         | 12,77         |
| 11,9          | 13,73         | 14,77         | 12,15         | 12,46         | 14,65         | 11,25         |
| 12,92         | 12,5          | 13,12         | 14,68         | 8,9           | 14,68         | 11,75         |
| 12,57         | 15,31         | 13,56         | 15,31         | 13,83         | 13,22         | 13,17         |
| 15,32         | 12,97         | 15,23         | 13,95         | 15,28         | 13,42         | 12,43         |
| 13,4          | 15,82         | 13,51         | 14,37         | 12,13         | 12,62         | 13,27         |
| 13,59         | 15,19         | 13,36         | 13,25         | 12,54         | 12,47         | 12,06         |
| 13,83         | 12,64         | 11,67         | 13,02         | 14,14         | 15,61         | 12,99         |
| 15,9          | 15,26         | 14,84         | 14,09         | 12,09         | 12,62         | 14,94         |
| 12,86         | 15,67         | 12,17         | 15,36         | 13,28         | 11,6          | 14,47         |
| 14,88         | 14,45         | 12,65         | 14,2          | 13,66         | 13,54         | 14,36         |
| 13,59         | 15,67         | 14,11         | 14,34         | 11,72         | 6,9           | 12,66         |
| 13,29         | 16,24         | 14,15         | 14,32         | 13,61         | 14,53         | 13,37         |
| 12,88         | 14,04         | 13,56         | 12,53         | 14,81         | 10,53         | 11,25         |
| 12,51         | 14            | 13,93         | 12,51         | 14,98         | 14,55         | 13,55         |
| 13,65         | 11,94         | 13,14         | 14,93         | 12,99         | 13,62         | 11,48         |
| 13,12         | 13,79         | 13,55         | 12,09         | 13,49         | 13            | 13,93         |
| 13,21         | 11,81         | 14,86         | 16,41         | 12,59         | 14,53         | 12,51         |
| 14,26         | 15,97         | 14,38         | 12,82         | 12,83         | 12,82         | 13,85         |
| 14,08         | 14,88         | 15,44         | 11,66         | 13,97         | 14,85         | 11,72         |
| 14,47         | 14,66         | 14,1          | 11,86         | 12,56         | 11,67         | 14,63         |
| 11,96         | 11,9          | 11,99         | 13,82         | 13,21         | 12,16         | 14,89         |
| 12,78         | 13,88         | 12,63         | 15,06         | 14,57         | 14,33         | 14,02         |
| 13,16         | 13,21         | 13,04         | 13,08         | 12,03         | 13,46         | 13,19         |
| 14,76         | 14,47         | 14,31         | 15,07         | 14,16         | 16,88         | 12,48         |
| 15,56         | 15,52         | 12,76         | 13,89         | 14,1          | 11,6          | 11,82         |
| 13,09         | 14,91         | 14,71         | 14,42         | 11,52         | 12,32         | 16,21         |
| 12,37         | 14,68         | 15,29         | 13,69         | 11,43         | 12,46         | 15,24         |
| 13,38         | 15,34         | 11,53         | 12,12         | 12,77         | 13,43         | 11,98         |
| 11,99         | 15,06         | 15,15         | 10,32         | 13,84         | 13,9          | 13,84         |
| 13,55         | 12,91         | 13,2          | 12,08         | 13,62         | 13,84         | 14,24         |
| 13,82         | 13,43         | 13,76         | 15            | 13,8          | 14,03         | 13,6          |
| 14,42         | 15            | 13,8          | 14,74         | 11,74         | 15,29         | 13,09         |
| 12,36         | 14,76         | 14,35         | 13,59         | 13,84         | 14,15         | 14,3          |
| 12,63         | 15,65         | 12,45         | 12,43         | 11,74         | 13,47         | 13,71         |
| 14,6          | 14,52         | 14,17         | 14,99         | 13,05         | 14,25         | 14,89         |
| 14,18         | 15,27         | 13,44         | 15,5          | 15,23         | 13,97         | 15,27         |
| 13,96         | 14,32         | 13,96         | 14            | 14,2          | 14,87         | 13,12         |
| 13,51         | 13,25         | 11,9          | 14,78         | 13,12         | 11,46         | 12,51         |
| 10,76         | 13,16         | 12,07         | 14,65         | 14,62         | 13,94         | 12,35         |
| 15,15         | 13,63         | 13,77         | 13,95         | 13,16         | 12,59         | 12,09         |
| 13,83         | 11,74         | 15,15         | 14,56         | 13,72         | 13,4          | 11,86         |
| 13            | 13,98         | 13,94         | 15,07         | 10,77         | 13,8          | 9,96          |
| 12,17         | 15,32         | 15,4          | 13,68         | 14,1          | 14,87         | 14,49         |
| 14,77         | 11,89         | 13,32         | 10,7          | 12,19         | 10,65         | 12,54         |
| 13,14         | 14,73         | 14,21         | 14,34         | 13,79         | 13,71         | 12,48         |
| 13,4          | 14,17         | 14,41         | 14,46         | 14,82         | 11,14         | 12,63         |
| 14,72         | 14,58         | 14,68         | 14,64         | 13,99         | 12,47         | 15,24         |
| 12,97         | 14,66         | 13,4          | 14,15         | 12,18         | 13,59         | 12            |
| 14,49         | 11,69         | 14,05         | 14,42         | 11,95         | 11,26         | 13,71         |

|       |       |       |       |       |       |       |
|-------|-------|-------|-------|-------|-------|-------|
| 14,11 | 14,08 | 13,14 | 12,77 | 15,79 | 13,3  | 13,25 |
| 11,47 | 13,91 | 12,29 | 14,23 | 12,3  | 14,89 | 13,43 |
| 13,88 | 14,36 | 13,67 | 14,03 | 14,14 | 14,99 | 14,35 |
| 12,86 | 12,4  | 12,53 | 14,92 | 15,4  | 14,11 | 12,91 |
| 14,23 | 13,01 | 14,2  | 15,14 | 11,41 | 13,57 | 13,28 |
| 13,74 | 15,58 | 15,01 | 15,32 | 13,16 | 13,13 | 12,95 |
| 13,45 | 14,05 | 12,39 | 15,26 | 12,89 | 13,73 | 11,16 |
| 15,67 | 13,63 | 14,13 | 16,27 | 12,76 | 14,25 | 15,34 |
| 14,91 | 13,84 | 14    | 14,47 | 13,58 | 14,5  | 12,83 |
| 13,08 | 14,17 | 14,56 | 15,5  | 14,23 | 12,77 | 11,9  |
| 13,02 | 16,38 | 15,37 | 12,13 | 13,23 | 12,91 | 14,84 |
| 13,45 | 15    | 13,52 | 13,71 | 12,83 | 13,48 | 12,84 |
| 15,99 | 12,11 | 15,3  | 14,21 | 13,35 | 13,93 | 14,27 |
| 14,68 | 13,34 | 13,74 | 13,55 | 12,92 | 12,07 | 14,92 |
| 14,23 | 12,8  | 11,94 | 13,73 | 14,01 | 15,01 | 11,98 |
| 13,96 | 12,75 | 9,92  | 13,14 | 15,13 | 14,65 | 12,74 |
| 11,91 | 12,76 | 11,19 | 13,14 | 14,03 | 13,92 | 14,81 |
| 15,18 | 14,35 | 12,93 | 14,67 | 14,99 | 12,82 | 14,47 |
| 12,56 | 11,78 | 14,71 | 14,46 | 12,08 | 15,78 | 15,15 |
| 14,55 | 13,18 | 11,91 | 14,32 | 13,62 | 13,71 | 14,95 |
| 11,25 | 13,91 | 14,16 | 13,02 | 14,81 | 12,04 | 13,82 |
| 15,61 | 13,64 | 15,11 | 15,03 | 14,31 | 12,95 | 14,53 |
| 11,27 | 13,62 | 14,29 | 14,54 | 11,8  | 13,63 | 13,58 |
| 13,15 | 11,49 | 13,54 | 15,31 | 13,13 | 14,77 | 13,2  |
| 14,18 | 13,97 | 13,87 | 12,15 | 14,27 | 11,89 | 13,36 |
| 13,23 | 14,23 | 11,75 | 15,62 | 13,61 | 13,42 | 11,55 |
| 12,68 | 12,49 | 13,47 | 13,29 | 11,72 | 12,44 | 14,67 |
| 15,72 | 15,41 | 15,36 | 13,84 | 12,23 | 13,15 | 14,45 |
| 11,88 | 14,12 | 13,45 | 15,47 | 9,54  | 12,29 | 13,7  |
| 13,46 | 13,97 | 15,23 | 13,92 | 14,24 | 14,42 | 12,49 |
| 13,55 | 14,93 | 14,55 | 13,7  | 12,78 | 13,59 | 12,14 |
| 15,98 | 15,3  | 15,7  | 15,96 | 12,88 | 13,72 | 13,69 |
| 15,18 | 15,13 | 14,49 | 13,99 | 14,3  | 13,89 | 11,49 |
| 13,4  | 12,51 | 12,07 | 15,32 | 14,28 | 8,21  | 14,19 |
| 14,31 | 14,01 | 15,35 | 13,41 | 13,53 | 12,97 | 12,21 |
| 13,44 | 14,16 | 12,97 | 12,88 | 14,35 | 15,69 | 8,53  |
| 15,37 | 12,9  | 12    | 14,91 | 11,48 | 14,87 | 13,58 |
| 12,72 | 14,05 | 11,67 | 14,23 | 12,18 | 12,04 | 14,16 |
| 15,84 | 12,02 | 16,88 | 13,42 | 14,37 | 12,7  | 14,99 |
| 13,11 | 13,93 | 15,28 | 14,25 | 8,34  | 12,01 | 12,95 |

|    |    |    |    |    |    |    |
|----|----|----|----|----|----|----|
| 0  | 0  | 0  | 0  | 0  | 0  | 0  |
| 0  | 0  | 0  | 0  | 0  | 0  | 0  |
| 0  | 0  | 0  | 0  | 0  | 1  | 0  |
| 0  | 0  | 0  | 0  | 1  | 0  | 0  |
| 0  | 0  | 0  | 0  | 2  | 1  | 1  |
| 0  | 0  | 1  | 0  | 1  | 1  | 1  |
| 1  | 0  | 0  | 2  | 1  | 2  | 0  |
| 9  | 8  | 9  | 2  | 12 | 9  | 14 |
| 18 | 14 | 17 | 13 | 24 | 22 | 25 |
| 37 | 25 | 32 | 27 | 29 | 35 | 27 |
| 21 | 28 | 24 | 35 | 23 | 22 | 25 |
| 14 | 23 | 16 | 19 | 7  | 5  | 6  |
| 0  | 2  | 1  | 2  | 0  | 2  | 1  |
| 0  | 0  | 0  | 0  | 0  | 0  | 0  |



| <b>558 cm</b> | <b>563 cm</b> | <b>568 cm</b> | <b>573 cm</b> | <b>578 cm</b> | <b>583 cm</b> |
|---------------|---------------|---------------|---------------|---------------|---------------|
| 14,55         | 12,7          | 12,21         | 13,5          | 11,52         | 13,88         |
| 14,97         | 14,32         | 13,38         | 14,68         | 13,35         | 12,54         |
| 13,67         | 12,3          | 11,44         | 14,21         | 12,32         | 7             |
| 13,78         | 14,11         | 12,36         | 13,28         | 12,78         | 11,92         |
| 14,92         | 13,32         | 11,71         | 12,86         | 13,27         | 12,61         |
| 11,75         | 11,85         | 14,66         | 12,66         | 12,72         | 14,04         |
| 14,32         | 15,15         | 13,58         | 12,59         | 14,1          | 15,01         |
| 14,48         | 16,07         | 15,54         | 13,94         | 12,95         | 14,11         |
| 13,58         | 13,51         | 15,11         | 11,49         | 13,3          | 12,94         |
| 15,21         | 11,6          | 12,63         | 15,89         | 12,06         | 12,96         |
| 15,68         | 11,88         | 15,05         | 12,09         | 14,65         | 14,7          |
| 14,55         | 13,56         | 11,43         | 14,31         | 13,49         | 15,1          |
| 14,53         | 12,55         | 14,41         | 14,07         | 12,32         | 13,73         |
| 12,37         | 14,14         | 12,21         | 13,13         | 14,42         | 14,27         |
| 14,77         | 14,69         | 13,23         | 15,05         | 14,17         | 14,71         |
| 10,1          | 14,25         | 13,48         | 14,37         | 13,91         | 16,76         |
| 12,89         | 13,95         | 13,21         | 13,2          | 11,26         | 15,13         |
| 12,74         | 14,12         | 14,26         | 14,12         | 15,31         | 14,07         |
| 13,81         | 14,02         | 15,13         | 12,69         | 11,97         | 13,8          |
| 11,97         | 12,83         | 14,53         | 8,91          | 14,54         | 13,53         |
| 11,15         | 15,37         | 14,29         | 12,68         | 15,1          | 12,79         |
| 13            | 12,35         | 14,02         | 14,56         | 14,71         | 12,77         |
| 13,31         | 9,67          | 12,09         | 13,77         | 13,42         | 14,16         |
| 12,36         | 13,12         | 12,61         | 12,81         | 9,27          | 15,23         |
| 12,99         | 13,43         | 13,87         | 13,34         | 15,16         | 14,64         |
| 12,82         | 14,26         | 13,82         | 13,14         | 13,21         | 15,01         |
| 15,98         | 12,79         | 14,21         | 8,61          | 11,88         | 12,75         |
| 14,74         | 14,62         | 11,41         | 14,16         | 10,4          | 14,69         |
| 13,08         | 11,93         | 14,03         | 12,27         | 13,25         | 15,63         |
| 15,13         | 13,48         | 12,56         | 13,52         | 15,58         | 14,43         |
| 13,53         | 14,44         | 12,67         | 12,89         | 12,53         | 12,93         |
| 13,69         | 12,62         | 12,74         | 14,7          | 13,68         | 10,94         |
| 12,39         | 13,25         | 14,68         | 12,79         | 13,9          | 12,27         |
| 13,98         | 12,83         | 9,57          | 11,62         | 13,91         | 12,68         |
| 14,46         | 11,94         | 14,28         | 13,64         | 13,73         | 12,34         |
| 12,13         | 15,22         | 11,94         | 11,76         | 13,75         | 13,31         |
| 15,8          | 13,2          | 13,1          | 11,74         | 12,65         | 13,86         |
| 15,58         | 14,09         | 11,16         | 11,98         | 14,65         | 15,17         |
| 12,84         | 13,16         | 13,89         | 13,48         | 13,21         | 12,35         |
| 13,89         | 14,19         | 13,09         | 11,09         | 13,1          | 11,33         |
| 14,6          | 12,32         | 12,25         | 14,66         | 11,46         | 13,55         |
| 14,11         | 12,51         | 13,86         | 14,68         | 12,93         | 12,24         |
| 14            | 11,13         | 10,9          | 13,41         | 12,83         | 14,48         |
| 14,08         | 13,9          | 13,97         | 13,31         | 12,41         | 10,85         |
| 12,45         | 14,02         | 14,21         | 13,67         | 14,19         | 13,72         |
| 15,09         | 15,63         | 11,5          | 13,68         | 12,84         | 13,39         |
| 13,91         | 11,89         | 13,78         | 13,4          | 12,61         | 11,8          |
| 14,31         | 15,36         | 13,68         | 13,35         | 14,64         | 13,84         |
| 13,44         | 9,79          | 14,21         | 14,43         | 13,97         | 12,87         |
| 13,96         | 15,28         | 6,39          | 13,09         | 14,23         | 13,72         |
| 13,08         | 12,7          | 14,53         | 14,56         | 14,63         | 12,54         |
| 12,62         | 13,16         | 11,17         | 12,7          | 9,54          | 15,51         |
| 13,36         | 12,87         | 14,25         | 13,78         | 12,72         | 13,17         |
| 11,89         | 14,16         | 12,36         | 6,08          | 11,4          | 12,7          |
| 14,26         | 12,02         | 12,45         | 14,09         | 12,58         | 13,89         |
| 14,14         | 13,11         | 14,67         | 14,37         | 13,5          | 15,58         |
| 13,7          | 11,85         | 15,1          | 13,56         | 14,21         | 14,7          |
| 14,06         | 11,61         | 13            | 15,61         | 14,95         | 12,83         |
| 15,75         | 12,29         | 13,87         | 15,42         | 14,27         | 13,34         |
| 15,28         | 12,64         | 14,66         | 14,65         | 14,01         | 13,94         |

|       |       |       |       |       |       |
|-------|-------|-------|-------|-------|-------|
| 13,27 | 14,67 | 12,65 | 12,88 | 12,44 | 10,23 |
| 13,82 | 13,08 | 14,2  | 12,17 | 12,47 | 14,02 |
| 14,74 | 11,39 | 14,3  | 15,81 | 14,2  | 12,68 |
| 13,15 | 13,21 | 12,26 | 11,54 | 9,67  | 15,62 |
| 12,41 | 12,19 | 14,89 | 13,8  | 15,11 | 11,66 |
| 13,87 | 15,84 | 12,77 | 14,29 | 13,95 | 13,37 |
| 11,94 | 13    | 13,73 | 14,42 | 13,05 | 12,95 |
| 14,46 | 13,73 | 12,37 | 14,9  | 11,99 | 14,75 |
| 15,32 | 13,84 | 12,47 | 14,03 | 14,32 | 12,29 |
| 15,47 | 14,09 | 14,65 | 14,22 | 15,03 | 12,54 |
| 11,54 | 14,68 | 14,35 | 14,62 | 13,31 | 15,89 |
| 15,28 | 13,85 | 14,19 | 14,02 | 15,7  | 12,63 |
| 13,9  | 14,07 | 14,29 | 12,5  | 14,08 | 14,39 |
| 13,56 | 12,77 | 14,72 | 11,21 | 12,23 | 13,19 |
| 13,86 | 11,57 | 14,83 | 14,85 | 14,18 | 12,99 |
| 14,47 | 13,1  | 14,78 | 14,48 | 14,23 | 13,6  |
| 11,99 | 13,96 | 14,57 | 14,08 | 13,41 | 13,25 |
| 14,11 | 14,19 | 11,2  | 12,27 | 14,08 | 13,4  |
| 12,69 | 13,67 | 12,87 | 12,96 | 13,97 | 14,56 |
| 13,21 | 13,8  | 13,31 | 12,36 | 11,82 | 12,69 |
| 14,76 | 14,31 | 12,8  | 13,35 | 13,07 | 12,64 |
| 14,06 | 14,06 | 13,99 | 14,44 | 14,05 | 15,2  |
| 14,57 | 12,79 | 11,2  | 12,34 | 13,76 | 12,92 |
| 12,6  | 12,71 | 14,45 | 13,38 | 13,68 | 13,43 |
| 15,02 | 12,48 | 11,12 | 13,54 | 14    | 12,08 |
| 16,13 | 12,59 | 11,72 | 15,11 | 13,55 | 13,94 |
| 13,5  | 16,29 | 12,76 | 14,37 | 12,53 | 13,77 |
| 15,01 | 11,59 | 14,05 | 12,93 | 12,44 | 14,15 |
| 12,41 | 14,59 | 14,12 | 14,24 | 10,92 | 11,43 |
| 11,93 | 12,07 | 11,97 | 13,56 | 11,13 | 13,56 |
| 12,56 | 11,6  | 10,84 | 13,55 | 14,01 | 13,21 |
| 14,15 | 12,8  | 9,83  | 14,35 | 13,45 | 13,03 |
| 13,73 | 16,62 | 14,58 | 13,49 | 15,15 | 14,49 |
| 14,15 | 10,93 | 13,3  | 14,07 | 12,39 | 12,25 |
| 14,36 | 12,95 | 13,08 | 13,4  | 14,68 | 14,48 |
| 13,07 | 7,45  | 12,87 | 12,14 | 13,35 | 13,11 |
| 12,12 | 13,53 | 12,89 | 14,6  | 9,83  | 13,37 |
| 13,23 | 12,86 | 14,26 | 11,7  | 14,89 | 11,67 |
| 12,41 | 13,7  | 15,19 | 13,55 | 12,4  | 11,18 |
| 14,61 | 12,98 | 14,67 | 13,94 | 12,47 | 12,68 |

|    |    |    |    |    |    |    |
|----|----|----|----|----|----|----|
| 0  | 0  | 0  | 0  | 0  | 0  | 0  |
| 0  | 0  | 0  | 0  | 0  | 0  | 0  |
| 0  | 0  | 1  | 1  | 0  | 0  | 0  |
| 0  | 1  | 0  | 0  | 0  | 0  | 1  |
| 0  | 0  | 0  | 2  | 0  | 0  | 0  |
| 0  | 2  | 2  | 0  | 4  | 0  | 0  |
| 1  | 1  | 2  | 0  | 2  | 2  | 3  |
| 8  | 13 | 13 | 9  | 9  | 9  | 7  |
| 18 | 26 | 22 | 20 | 23 | 29 | 29 |
| 29 | 25 | 21 | 30 | 28 | 28 | 28 |
| 29 | 22 | 33 | 32 | 26 | 19 | 19 |
| 14 | 7  | 6  | 6  | 8  | 12 | 12 |
| 1  | 3  | 0  | 0  | 0  | 1  | 1  |
| 0  | 0  | 0  | 0  | 0  | 0  | 0  |

| Depth (comp) | Age (kyrs) |
|--------------|------------|
| 3            | 0,000      |
| 8            | 2,299      |
| 13           | 4,594      |
| 18           | 6,879      |
| 23           | 9,150      |
| 28           | 11,402     |
| 33           | 13,631     |
| 38           | 15,832     |
| 43           | 18,000     |
| 48           | 20,132     |
| 53           | 22,229     |
| 58           | 24,296     |
| 63           | 26,334     |
| 68           | 28,348     |
| 73           | 30,340     |
| 78           | 32,314     |
| 83           | 34,273     |
| 88           | 36,220     |
| 93           | 38,158     |
| 98           | 40,090     |
| 103          | 42,020     |
| 108          | 43,951     |
| 113          | 45,885     |
| 118          | 47,827     |
| 123          | 49,779     |
| 128          | 51,745     |
| 133          | 53,727     |
| 138          | 55,729     |
| 143          | 57,754     |
| 148          | 59,806     |
| 153          | 61,886     |
| 158          | 64,000     |
| 163          | 66,149     |
| 168          | 68,338     |
| 173          | 70,570     |
| 178          | 72,849     |
| 183          | 75,177     |
| 188          | 77,560     |
| 193          | 80,000     |
| 198          | 82,501     |
| 203          | 85,067     |
| 208          | 87,702     |
| 213          | 90,408     |
| 218          | 93,191     |
| 223          | 96,054     |
| 228          | 99,000     |
| 233          | 102,024    |

|     |         |
|-----|---------|
| 238 | 105,079 |
| 243 | 108,112 |
| 248 | 111,067 |
| 253 | 113,888 |
| 258 | 116,520 |
| 263 | 118,910 |
| 268 | 121,000 |
| 273 | 122,761 |
| 278 | 124,259 |
| 283 | 125,584 |
| 288 | 126,828 |
| 293 | 128,081 |
| 298 | 129,434 |
| 303 | 130,977 |
| 308 | 132,802 |
| 313 | 135,000 |
| 318 | 137,635 |
| 323 | 140,668 |
| 328 | 144,037 |
| 333 | 147,675 |
| 338 | 151,520 |
| 343 | 155,507 |
| 348 | 159,572 |
| 353 | 163,650 |
| 358 | 167,678 |
| 363 | 171,591 |
| 368 | 175,326 |
| 373 | 178,816 |
| 378 | 182,000 |
| 383 | 184,843 |
| 388 | 187,440 |
| 393 | 189,915 |
| 398 | 192,394 |
| 403 | 195,000 |
| 408 | 197,794 |
| 413 | 200,571 |
| 418 | 203,063 |
| 423 | 205,000 |
| 428 | 206,233 |
| 433 | 207,099 |
| 438 | 208,052 |
| 443 | 209,549 |
| 448 | 212,046 |
| 453 | 216,000 |
| 458 | 221,604 |
| 463 | 228,000 |
| 468 | 234,108 |
| 473 | 239,000 |

|     |         |
|-----|---------|
| 478 | 242,439 |
| 483 | 244,896 |
| 488 | 246,545 |
| 493 | 247,558 |
| 498 | 248,109 |
| 503 | 248,372 |
| 508 | 248,519 |
| 513 | 248,724 |
| 518 | 249,160 |
| 523 | 250,000 |
